# Supplementary material for: Shorter headed dogs, visually cooperative breeds, younger and playful dogs form eye contact faster with an unfamiliar human
Source: PubMed Central journal article supplement (PMC8084920; doi:10.1038/s41598-021-88702-w), 2021-04-29
Supplement: 41598_2021_88702_MOESM2_ESM.pdf [file 41598_2021_88702_MOESM2_ESM.pdf]

# **Shorter headed dogs, visually cooperative breeds, younger and playful dogs form eye contact faster with an unfamiliar human**

Zsófia Bognár<sup>1\*</sup>, Dóra Szabó<sup>1</sup>, Alexandra Deés<sup>1</sup>, Enikő Kubinyi<sup>1</sup>

<sup>1</sup> Senior Family Dog Project, Department of Ethology, Eötvös Loránd University, Budapest, Hungary

\*Corresponding author: [bognarzsosof@gmail.com](mailto:bognarzsosof@gmail.com)

# 1. Starting the analysis

## a. Import data

```
library(readxl)

EC_data <- read_excel("D:/Where/Is/The file/On your computer/Bognar_et_al_EyeContact_ms_suppl_data.xlsx", sheet = "Data")

EC_data$DogID <- factor(EC_data$DogID)
EC_data$CI_fig <- factor(EC_data$CI_fig, levels = c('43.5-49.9', '50.0-55.3', '55.4-74.7'))
EC_data$BreedGroup <- factor(EC_data$BreedGroup)
EC_data$Age_fig <- factor(EC_data$Age_fig, levels = c('31.4-79.4', '79.8-126.1', '126.8-174.5'))
EC_data$Greet <- factor(EC_data$Greet)
EC_data$Play <- factor(EC_data$Play)
EC_data$Sex <- factor(EC_data$Sex)
EC_data$Neutered <- factor(EC_data$Neutered)
EC_data$DogSchool <- factor(EC_data$DogSchool)
EC_data$Exp <- factor(EC_data$Exp)
EC_data$Trial <- factor(EC_data$Trial, levels = c('1', '2', '3', '4', '5', '6', '7', '8', '9', '10', '11', '12', '13', '14', '15'))
EC_data$Event <- as.numeric(EC_data$Event)

Soc_data <- subset(EC_data, Trial==1) # contains only one data point for each dog; for demography and sociability analysis

Soc_data_fig <- read_excel("D:/Where/Is/The file/On your computer/Bognar_et_al_EyeContact_ms_suppl_data.xlsx", sheet = "Data")
Soc_data_fig <- subset(Soc_data_fig, Trial==1) # separate datasheet is needed for sociability tests' figures

options(digits=4) # show only 4 digits
```

## b. Data verification

```
library(emmeans)

#Possible correlations
BreedCI_mod <- lm(CI ~ BreedGroup, Soc_data) # CI of breed groups
pairs(emmeans(BreedCI_mod, ~BreedGroup))

## contrast      estimate    SE  df t.ratio p.value
## Coop - Mixed   -0.295  1.22 122  -0.241  0.9685
## Coop - Noncoop -0.561  1.48 122  -0.380  0.9235
## Mixed - Noncoop -0.267  1.40 122  -0.190  0.9803
##
## P value adjustment: tukey method for comparing a family of 3 estimates

summary(BreedCI_mod)

##
## Call:
## lm(formula = CI ~ BreedGroup, data = Soc_data)
##
## Residuals:
```

```

##      Min      1Q Median      3Q      Max
## -10.37  -4.36  -0.40   3.16  20.84
##
## Coefficients:
##              Estimate Std. Error t value Pr(>|t|)
## (Intercept)      53.275      0.924   57.65 <2e-16 ***
## BreedGroupMixed    0.295      1.223    0.24  0.81
## BreedGroupNoncoop  0.561      1.477    0.38  0.70
## ---
## Signif. codes:  0 '***' 0.001 '**' 0.01 '*' 0.05 '.' 0.1 ' ' 1
##
## Residual standard error: 5.99 on 122 degrees of freedom
## Multiple R-squared:  0.00122, Adjusted R-squared:  -0.0152
## F-statistic: 0.0746 on 2 and 122 DF,  p-value: 0.928

BreedAge_mod <- lm(Age ~ BreedGroup, Soc_data) # Age of breed groups
pairs(emmeans(BreedAge_mod, ~BreedGroup))

## contrast      estimate    SE  df t.ratio p.value
## Coop - Mixed      6.37  7.93 122  0.802  0.7022
## Coop - Noncoop    18.39  9.59 122  1.919  0.1377
## Mixed - Noncoop   12.03  9.11 122  1.321  0.3863
##
## P value adjustment: tukey method for comparing a family of 3 estimates

summary(BreedAge_mod)

##
## Call:
## lm(formula = Age ~ BreedGroup, data = Soc_data)
##
## Residuals:
##      Min      1Q Median      3Q      Max
## -76.30 -30.74   6.99  30.30  73.16
##
## Coefficients:
##              Estimate Std. Error t value Pr(>|t|)
## (Intercept)      107.67      6.00   17.95 <2e-16 ***
## BreedGroupMixed   -6.37      7.93   -0.80  0.424
## BreedGroupNoncoop -18.39      9.59   -1.92  0.057 .
## ---
## Signif. codes:  0 '***' 0.001 '**' 0.01 '*' 0.05 '.' 0.1 ' ' 1
##
## Residual standard error: 38.9 on 122 degrees of freedom
## Multiple R-squared:  0.0294, Adjusted R-squared:  0.0135
## F-statistic: 1.85 on 2 and 122 DF,  p-value: 0.162

cor(Soc_data$Age, Soc_data$CI) #Age and CI

## [1] 0.1365

cor.test(Soc_data$Age, Soc_data$CI)

##
## Pearson's product-moment correlation
##
## data: Soc_data$Age and Soc_data$CI
## t = 1.5, df = 123, p-value = 0.1

```

```
## alternative hypothesis: true correlation is not equal to 0
## 95 percent confidence interval:
## -0.04012  0.30476
## sample estimates:
##      cor
## 0.1365
```

```
#Calculating means and SEs for each breed group
```

```
Soc_data_Coop <- subset(Soc_data, BreedGroup=="Coop")
mean(Soc_data_Coop$CI)
```

```
## [1] 53.28
```

```
sd(Soc_data_Coop$CI)
```

```
## [1] 5.279
```

```
mean(Soc_data_Coop$Age)
```

```
## [1] 107.7
```

```
sd(Soc_data_Coop$Age)
```

```
## [1] 38.1
```

```
Soc_data_Noncoop <- subset(Soc_data, BreedGroup=="Noncoop")
mean(Soc_data_Noncoop$CI)
```

```
## [1] 53.84
```

```
sd(Soc_data_Noncoop$CI)
```

```
## [1] 8.274
```

```
mean(Soc_data_Noncoop$Age)
```

```
## [1] 89.27
```

```
sd(Soc_data_Noncoop$Age)
```

```
## [1] 37.9
```

```
Soc_data_Mixed <- subset(Soc_data, BreedGroup=="Mixed")
mean(Soc_data_Mixed$CI)
```

```
## [1] 53.57
```

```
sd(Soc_data_Mixed$CI)
```

```
## [1] 5.141
```

```
mean(Soc_data_Mixed$Age)
```

```
## [1] 101.3
```

```
sd(Soc_data_Mixed$Age)
```

```
## [1] 39.87
```

```
#Sociability scores
```

```
tbl <- table(Soc_data$Greet, Soc_data$Play)
chisq.test(tbl)
```

```
##
## Pearson's Chi-squared test with Yates' continuity correction
##
## data: tbl
## X-squared = 14, df = 1, p-value = 1e-04

#Possible multicollinearity
library(coxme)

library(car)

EC_mod <- coxme(Surv(LEC, Event) ~ CI + BreedGroup + Age + Greet + Play + Trial + (1|DogID)
, data = EC_data)

car::vif(EC_mod) # Calculating VIF scores

##           GVIF Df GVIF^(1/(2*Df))
## CI           1.016  1           1.008
## BreedGroup  1.061  2           1.015
## Age          1.421  1           1.192
## Greet        1.269  1           1.127
## Play         1.547  1           1.244
## Trial         1.008 14           1.000

# If a VIF is greater than 10, you have high multicollinearity and the variation will seem
larger and the factor will appear to be more influential
#than it is. If VIF is closer to 1, then the model is much stronger, as the factors are not
impacted by correlation with other factors.
```

## 2. Model selections

### a. Eye contact establishment test

```
EC_mod0 <- coxme(Surv(LEC, Event) ~ 1 + (1|DogID), data = EC_data) # null modell

#First step
CI_mod <- update(EC_mod0, .~. + CI)
anova(EC_mod0, CI_mod)

## Analysis of Deviance Table
## Cox model: response is Surv(LEC, Event)
## Model 1: ~1 + (1 | DogID)
## Model 2: ~(1 | DogID) + CI
##   loglik Chisq Df P(>|Chi|)
## 1 -10920
## 2 -10918     3  1    0.083 .
## ---
## Signif. codes:  0 '***' 0.001 '**' 0.01 '*' 0.05 '.' 0.1 ' ' 1

Breed_mod <- update(EC_mod0, .~. + BreedGroup)
anova(EC_mod0, Breed_mod)

## Analysis of Deviance Table
## Cox model: response is Surv(LEC, Event)
## Model 1: ~1 + (1 | DogID)
## Model 2: ~(1 | DogID) + BreedGroup
##   loglik Chisq Df P(>|Chi|)
```

```

## 1 -10920
## 2 -10918  3.73  2      0.15

Age_mod <- update(EC_mod0, .~. + Age)
anova(EC_mod0, Age_mod)

## Analysis of Deviance Table
## Cox model: response is Surv(LEC, Event)
## Model 1: ~1 + (1 | DogID)
## Model 2: ~(1 | DogID) + Age
##   loglik Chisq Df P(>|Chi|)
## 1 -10920
## 2 -10915  9.52  1      0.002 **
## ---
## Signif. codes:  0 '***' 0.001 '**' 0.01 '*' 0.05 '.' 0.1 ' ' 1

Greet_mod <- update(EC_mod0, .~. + Greet)
anova(EC_mod0, Greet_mod)

## Analysis of Deviance Table
## Cox model: response is Surv(LEC, Event)
## Model 1: ~1 + (1 | DogID)
## Model 2: ~(1 | DogID) + Greet
##   loglik Chisq Df P(>|Chi|)
## 1 -10920
## 2 -10921  2.41  1      0.12

Play_mod <- update(EC_mod0, .~. + Play)
anova(EC_mod0, Play_mod)

## Analysis of Deviance Table
## Cox model: response is Surv(LEC, Event)
## Model 1: ~1 + (1 | DogID)
## Model 2: ~(1 | DogID) + Play
##   loglik Chisq Df P(>|Chi|)
## 1 -10920
## 2 -10920  1.37  1      0.24

Trial_mod <- update(EC_mod0, .~. + Trial)
anova(EC_mod0, Trial_mod) #*

## Analysis of Deviance Table
## Cox model: response is Surv(LEC, Event)
## Model 1: ~1 + (1 | DogID)
## Model 2: ~(1 | DogID) + Trial
##   loglik Chisq Df P(>|Chi|)
## 1 -10920
## 2 -10866  108 14      <2e-16 ***
## ---
## Signif. codes:  0 '***' 0.001 '**' 0.01 '*' 0.05 '.' 0.1 ' ' 1

#Second step
CI_mod <- update(Trial_mod, .~. + CI)
anova(Trial_mod, CI_mod)

## Analysis of Deviance Table
## Cox model: response is Surv(LEC, Event)
## Model 1: ~(1 | DogID) + Trial
## Model 2: ~(1 | DogID) + Trial + CI

```

```

##   loglik Chisq Df P(>|Chi|)
## 1 -10866
## 2 -10864  3.22  1    0.073 .
## ---
## Signif. codes:  0 '***' 0.001 '**' 0.01 '*' 0.05 '.' 0.1 ' ' 1

Breed_mod <- update(Trial_mod, .~. + BreedGroup)
anova(Trial_mod, Breed_mod) #*

## Analysis of Deviance Table
## Cox model: response is Surv(LEC, Event)
## Model 1: ~(1 | DogID) + Trial
## Model 2: ~(1 | DogID) + Trial + BreedGroup
##   loglik Chisq Df P(>|Chi|)
## 1 -10866
## 2 -10861  9.75  2    0.0076 **
## ---
## Signif. codes:  0 '***' 0.001 '**' 0.01 '*' 0.05 '.' 0.1 ' ' 1

Age_mod <- update(Trial_mod, .~. + Age)
anova(Trial_mod, Age_mod)

## Analysis of Deviance Table
## Cox model: response is Surv(LEC, Event)
## Model 1: ~(1 | DogID) + Trial
## Model 2: ~(1 | DogID) + Trial + Age
##   loglik Chisq Df P(>|Chi|)
## 1 -10866
## 2 -10864  3.68  1    0.055 .
## ---
## Signif. codes:  0 '***' 0.001 '**' 0.01 '*' 0.05 '.' 0.1 ' ' 1

Greet_mod <- update(Trial_mod, .~. + Greet)
anova(Trial_mod, Greet_mod)

## Analysis of Deviance Table
## Cox model: response is Surv(LEC, Event)
## Model 1: ~(1 | DogID) + Trial
## Model 2: ~(1 | DogID) + Trial + Greet
##   loglik Chisq Df P(>|Chi|)
## 1 -10866
## 2 -10866  1.29  1    0.26

Play_mod <- update(Trial_mod, .~. + Play)
anova(Trial_mod, Play_mod)

## Analysis of Deviance Table
## Cox model: response is Surv(LEC, Event)
## Model 1: ~(1 | DogID) + Trial
## Model 2: ~(1 | DogID) + Trial + Play
##   loglik Chisq Df P(>|Chi|)
## 1 -10866
## 2 -10870  8.37  1    0.0038 **
## ---
## Signif. codes:  0 '***' 0.001 '**' 0.01 '*' 0.05 '.' 0.1 ' ' 1

#Third step
CI_mod <- update(Breed_mod, .~. + CI)
anova(Breed_mod, CI_mod)

```

```
## Analysis of Deviance Table
## Cox model: response is Surv(LEC, Event)
## Model 1: ~(1 | DogID) + Trial + BreedGroup
## Model 2: ~(1 | DogID) + Trial + BreedGroup + CI
##   loglik Chisq Df P(>|Chi|)
## 1 -10861
## 2 -10864  6.45  1    0.011 *
## ---
## Signif. codes:  0 '***' 0.001 '**' 0.01 '*' 0.05 '.' 0.1 ' ' 1
```

```
Age_mod <- update(Breed_mod, .~. + Age)
anova(Breed_mod, Age_mod) #*
```

```
## Analysis of Deviance Table
## Cox model: response is Surv(LEC, Event)
## Model 1: ~(1 | DogID) + Trial + BreedGroup
## Model 2: ~(1 | DogID) + Trial + BreedGroup + Age
##   loglik Chisq Df P(>|Chi|)
## 1 -10861
## 2 -10856  9.96  1    0.0016 **
## ---
## Signif. codes:  0 '***' 0.001 '**' 0.01 '*' 0.05 '.' 0.1 ' ' 1
```

```
Greet_mod <- update(Breed_mod, .~. + Greet)
anova(Breed_mod, Greet_mod)
```

```
## Analysis of Deviance Table
## Cox model: response is Surv(LEC, Event)
## Model 1: ~(1 | DogID) + Trial + BreedGroup
## Model 2: ~(1 | DogID) + Trial + BreedGroup + Greet
##   loglik Chisq Df P(>|Chi|)
## 1 -10861
## 2 -10864  6.87  1    0.0088 **
## ---
## Signif. codes:  0 '***' 0.001 '**' 0.01 '*' 0.05 '.' 0.1 ' ' 1
```

```
Play_mod <- update(Breed_mod, .~. + Play)
anova(Breed_mod, Play_mod)
```

```
## Analysis of Deviance Table
## Cox model: response is Surv(LEC, Event)
## Model 1: ~(1 | DogID) + Trial + BreedGroup
## Model 2: ~(1 | DogID) + Trial + BreedGroup + Play
##   loglik Chisq Df P(>|Chi|)
## 1 -10861
## 2 -10865  7.97  1    0.0047 **
## ---
## Signif. codes:  0 '***' 0.001 '**' 0.01 '*' 0.05 '.' 0.1 ' ' 1
```

#### *#Forth step*

```
CI_mod <- update(Age_mod, .~. + CI)
anova(Age_mod, CI_mod) #*
```

```
## Analysis of Deviance Table
## Cox model: response is Surv(LEC, Event)
## Model 1: ~(1 | DogID) + Trial + BreedGroup + Age
## Model 2: ~(1 | DogID) + Trial + BreedGroup + Age + CI
##   loglik Chisq Df P(>|Chi|)
```



```

## 1 -10856
## 2 -10851 10.1 1 0.0015 **
## ---
## Signif. codes: 0 '***' 0.001 '**' 0.01 '*' 0.05 '.' 0.1 ' ' 1

Greet_mod <- update(Age_mod, .~. + Greet)
anova(Age_mod, Greet_mod)

## Analysis of Deviance Table
## Cox model: response is Surv(LEC, Event)
## Model 1: ~(1 | DogID) + Trial + BreedGroup + Age
## Model 2: ~(1 | DogID) + Trial + BreedGroup + Age + Greet
## loglik Chisq Df P(>|Chi|)
## 1 -10856
## 2 -10858 3.76 1 0.053 .
## ---
## Signif. codes: 0 '***' 0.001 '**' 0.01 '*' 0.05 '.' 0.1 ' ' 1

Play_mod <- update(Age_mod, .~. + Play)
anova(Age_mod, Play_mod)

## Analysis of Deviance Table
## Cox model: response is Surv(LEC, Event)
## Model 1: ~(1 | DogID) + Trial + BreedGroup + Age
## Model 2: ~(1 | DogID) + Trial + BreedGroup + Age + Play
## loglik Chisq Df P(>|Chi|)
## 1 -10856
## 2 -10857 3.65 1 0.056 .
## ---
## Signif. codes: 0 '***' 0.001 '**' 0.01 '*' 0.05 '.' 0.1 ' ' 1

#Fifth step
Greet_mod <- update(CI_mod, .~. + Greet)
anova(CI_mod, Greet_mod)

## Analysis of Deviance Table
## Cox model: response is Surv(LEC, Event)
## Model 1: ~(1 | DogID) + Trial + BreedGroup + Age + CI
## Model 2: ~(1 | DogID) + Trial + BreedGroup + Age + CI + Greet
## loglik Chisq Df P(>|Chi|)
## 1 -10851
## 2 -10852 2.78 1 0.095 .
## ---
## Signif. codes: 0 '***' 0.001 '**' 0.01 '*' 0.05 '.' 0.1 ' ' 1

Play_mod <- update(CI_mod, .~. + Play)
anova(CI_mod, Play_mod)

## Analysis of Deviance Table
## Cox model: response is Surv(LEC, Event)
## Model 1: ~(1 | DogID) + Trial + BreedGroup + Age + CI
## Model 2: ~(1 | DogID) + Trial + BreedGroup + Age + CI + Play
## loglik Chisq Df P(>|Chi|)
## 1 -10851
## 2 -10852 2.88 1 0.09 .
## ---
## Signif. codes: 0 '***' 0.001 '**' 0.01 '*' 0.05 '.' 0.1 ' ' 1

summary(Play_mod) #*

```

```

## Cox mixed-effects model fit by maximum likelihood
## Data: EC_data
## events, n = 1722, 1875
## Iterations= 15 91
##          NULL Integrated Fitted
## Log-likelihood -11640      -10852 -10594
##
##          Chisq df p AIC BIC
## Integrated loglik 1576 20 0 1536 1427
## Penalized loglik 2093 130 0 1833 1124
##
## Model: Surv(LEC, Event) ~ (1 | DogID) + Trial + BreedGroup + Age + CI + Play
## Fixed coefficients
##          coef exp(coef) se(coef)      z      p
## Trial2          0.05155    1.0529 0.135161  0.38 7.0e-01
## Trial3          0.18101    1.1984 0.133714  1.35 1.8e-01
## Trial4          0.42467    1.5291 0.133549  3.18 1.5e-03
## Trial5          0.62033    1.8595 0.135456  4.58 4.7e-06
## Trial6          0.64176    1.8998 0.134994  4.75 2.0e-06
## Trial7          0.48484    1.6239 0.135408  3.58 3.4e-04
## Trial8          0.65621    1.9275 0.135072  4.86 1.2e-06
## Trial9          0.69865    2.0110 0.137392  5.09 3.7e-07
## Trial10         0.63043    1.8784 0.136596  4.62 3.9e-06
## Trial11         0.70013    2.0140 0.137207  5.10 3.3e-07
## Trial12         0.77089    2.1617 0.136591  5.64 1.7e-08
## Trial13         0.84302    2.3234 0.139037  6.06 1.3e-09
## Trial14         0.57369    1.7748 0.137465  4.17 3.0e-05
## Trial15         0.72470    2.0641 0.138162  5.25 1.6e-07
## BreedGroupMixed -0.01015    0.9899 0.251391 -0.04 9.7e-01
## BreedGroupNoncoop -1.08678    0.3373 0.298336 -3.64 2.7e-04
## Age            -0.01428    0.9858 0.002707 -5.27 1.3e-07
## CI             0.05381    1.0553 0.018295  2.94 3.3e-03
## Play1         0.51487    1.6734 0.226305  2.28 2.3e-02
##
## Random effects
## Group Variable Std Dev Variance
## DogID Intercept 1.051  1.106

#Sixth step
Greet_mod <- update(Play_mod, .~. + Greet)
anova(Play_mod, Greet_mod)

## Analysis of Deviance Table
## Cox model: response is Surv(LEC, Event)
## Model 1: ~(1 | DogID) + Trial + BreedGroup + Age + CI + Play
## Model 2: ~(1 | DogID) + Trial + BreedGroup + Age + CI + Play + Greet
## loglik Chisq Df P(>|Chi|)
## 1 -10852
## 2 -10853 2.21 1 0.14

#FINAL model
EC_mod <- coxme(Surv(LEC, Event) ~ CI + BreedGroup + Age + Play + Trial + (1|DogID), data =
EC_data)
summary(EC_mod)

## Cox mixed-effects model fit by maximum likelihood
## Data: EC_data

```

```

##   events, n = 1722, 1875
##   Iterations= 15 91
##           NULL Integrated Fitted
## Log-likelihood -11640      -10852 -10594
##
##           Chisq  df p  AIC  BIC
## Integrated loglik  1576  20 0 1536 1427
## Penalized loglik  2093 130 0 1833 1124
##
## Model: Surv(LEC, Event) ~ CI + BreedGroup + Age + Play + Trial + (1 | DogID)
## Fixed coefficients
##           coef exp(coef) se(coef)      z      p
## CI          0.05381    1.0553 0.018295  2.94 3.3e-03
## BreedGroupMixed -0.01015    0.9899 0.251391 -0.04 9.7e-01
## BreedGroupNoncoop -1.08678    0.3373 0.298336 -3.64 2.7e-04
## Age          -0.01428    0.9858 0.002707 -5.27 1.3e-07
## Play1        0.51487    1.6734 0.226305  2.28 2.3e-02
## Trial2        0.05155    1.0529 0.135161  0.38 7.0e-01
## Trial3        0.18101    1.1984 0.133714  1.35 1.8e-01
## Trial4        0.42467    1.5291 0.133549  3.18 1.5e-03
## Trial5        0.62033    1.8595 0.135456  4.58 4.7e-06
## Trial6        0.64176    1.8998 0.134994  4.75 2.0e-06
## Trial7        0.48484    1.6239 0.135408  3.58 3.4e-04
## Trial8        0.65621    1.9275 0.135072  4.86 1.2e-06
## Trial9        0.69865    2.0110 0.137392  5.09 3.7e-07
## Trial10       0.63043    1.8784 0.136596  4.62 3.9e-06
## Trial11       0.70013    2.0140 0.137207  5.10 3.3e-07
## Trial12       0.77089    2.1617 0.136591  5.64 1.7e-08
## Trial13       0.84302    2.3234 0.139037  6.06 1.3e-09
## Trial14       0.57369    1.7748 0.137465  4.17 3.0e-05
## Trial15       0.72470    2.0641 0.138162  5.25 1.6e-07
##
## Random effects
## Group Variable  Std Dev Variance
## DogID Intercept 1.051    1.106

pairs(emmeans(EC_mod, ~BreedGroup))

## contrast      estimate      SE  df z.ratio p.value
## Coop - Mixed    0.0102 0.251 Inf  0.040  0.9991
## Coop - Noncoop  1.0868 0.298 Inf  3.643  0.0008
## Mixed - Noncoop  1.0766 0.273 Inf  3.949  0.0002
##
## Results are averaged over the levels of: Play, Trial
## Results are given on the log (not the response) scale.
## P value adjustment: tukey method for comparing a family of 3 estimates

pairs(emmeans(EC_mod, ~Trial))

## contrast estimate      SE  df z.ratio p.value
## 1 - 2      -0.0515 0.135 Inf -0.381  1.0000
## 1 - 3      -0.1810 0.134 Inf -1.354  0.9909
## 1 - 4      -0.4247 0.134 Inf -3.180  0.0943
## 1 - 5      -0.6203 0.135 Inf -4.580  0.0005
## 1 - 6      -0.6418 0.135 Inf -4.754  0.0002
## 1 - 7      -0.4848 0.135 Inf -3.581  0.0268
## 1 - 8      -0.6562 0.135 Inf -4.858  0.0001

```

|    |        |         |       |     |        |        |
|----|--------|---------|-------|-----|--------|--------|
| ## | 1 - 9  | -0.6987 | 0.137 | Inf | -5.085 | <.0001 |
| ## | 1 - 10 | -0.6304 | 0.137 | Inf | -4.615 | 0.0004 |
| ## | 1 - 11 | -0.7001 | 0.137 | Inf | -5.103 | <.0001 |
| ## | 1 - 12 | -0.7709 | 0.137 | Inf | -5.644 | <.0001 |
| ## | 1 - 13 | -0.8430 | 0.139 | Inf | -6.063 | <.0001 |
| ## | 1 - 14 | -0.5737 | 0.137 | Inf | -4.173 | 0.0028 |
| ## | 1 - 15 | -0.7247 | 0.138 | Inf | -5.245 | <.0001 |
| ## | 2 - 3  | -0.1295 | 0.135 | Inf | -0.960 | 0.9998 |
| ## | 2 - 4  | -0.3731 | 0.135 | Inf | -2.769 | 0.2636 |
| ## | 2 - 5  | -0.5688 | 0.135 | Inf | -4.207 | 0.0024 |
| ## | 2 - 6  | -0.5902 | 0.136 | Inf | -4.325 | 0.0014 |
| ## | 2 - 7  | -0.4333 | 0.135 | Inf | -3.202 | 0.0887 |
| ## | 2 - 8  | -0.6047 | 0.137 | Inf | -4.407 | 0.0010 |
| ## | 2 - 9  | -0.6471 | 0.138 | Inf | -4.682 | 0.0003 |
| ## | 2 - 10 | -0.5789 | 0.137 | Inf | -4.220 | 0.0023 |
| ## | 2 - 11 | -0.6486 | 0.138 | Inf | -4.689 | 0.0003 |
| ## | 2 - 12 | -0.7193 | 0.138 | Inf | -5.211 | <.0001 |
| ## | 2 - 13 | -0.7915 | 0.139 | Inf | -5.700 | <.0001 |
| ## | 2 - 14 | -0.5221 | 0.138 | Inf | -3.772 | 0.0135 |
| ## | 2 - 15 | -0.6732 | 0.139 | Inf | -4.839 | 0.0001 |
| ## | 3 - 4  | -0.2437 | 0.134 | Inf | -1.815 | 0.8927 |
| ## | 3 - 5  | -0.4393 | 0.135 | Inf | -3.249 | 0.0773 |
| ## | 3 - 6  | -0.4608 | 0.136 | Inf | -3.390 | 0.0502 |
| ## | 3 - 7  | -0.3038 | 0.135 | Inf | -2.244 | 0.6324 |
| ## | 3 - 8  | -0.4752 | 0.136 | Inf | -3.494 | 0.0358 |
| ## | 3 - 9  | -0.5176 | 0.137 | Inf | -3.769 | 0.0137 |
| ## | 3 - 10 | -0.4494 | 0.137 | Inf | -3.283 | 0.0698 |
| ## | 3 - 11 | -0.5191 | 0.137 | Inf | -3.783 | 0.0130 |
| ## | 3 - 12 | -0.5899 | 0.137 | Inf | -4.293 | 0.0017 |
| ## | 3 - 13 | -0.6620 | 0.139 | Inf | -4.764 | 0.0002 |
| ## | 3 - 14 | -0.3927 | 0.139 | Inf | -2.831 | 0.2301 |
| ## | 3 - 15 | -0.5437 | 0.138 | Inf | -3.937 | 0.0072 |
| ## | 4 - 5  | -0.1957 | 0.134 | Inf | -1.456 | 0.9820 |
| ## | 4 - 6  | -0.2171 | 0.134 | Inf | -1.615 | 0.9557 |
| ## | 4 - 7  | -0.0602 | 0.134 | Inf | -0.448 | 1.0000 |
| ## | 4 - 8  | -0.2315 | 0.135 | Inf | -1.710 | 0.9305 |
| ## | 4 - 9  | -0.2740 | 0.137 | Inf | -2.003 | 0.7968 |
| ## | 4 - 10 | -0.2058 | 0.135 | Inf | -1.523 | 0.9732 |
| ## | 4 - 11 | -0.2755 | 0.137 | Inf | -2.010 | 0.7928 |
| ## | 4 - 12 | -0.3462 | 0.136 | Inf | -2.545 | 0.4076 |
| ## | 4 - 13 | -0.4184 | 0.137 | Inf | -3.046 | 0.1359 |
| ## | 4 - 14 | -0.1490 | 0.137 | Inf | -1.089 | 0.9991 |
| ## | 4 - 15 | -0.3000 | 0.137 | Inf | -2.186 | 0.6751 |
| ## | 5 - 6  | -0.0214 | 0.136 | Inf | -0.158 | 1.0000 |
| ## | 5 - 7  | 0.1355  | 0.134 | Inf | 1.007  | 0.9996 |
| ## | 5 - 8  | -0.0359 | 0.135 | Inf | -0.266 | 1.0000 |
| ## | 5 - 9  | -0.0783 | 0.136 | Inf | -0.574 | 1.0000 |
| ## | 5 - 10 | -0.0101 | 0.136 | Inf | -0.074 | 1.0000 |
| ## | 5 - 11 | -0.0798 | 0.137 | Inf | -0.584 | 1.0000 |
| ## | 5 - 12 | -0.1506 | 0.137 | Inf | -1.103 | 0.9989 |
| ## | 5 - 13 | -0.2227 | 0.138 | Inf | -1.611 | 0.9568 |
| ## | 5 - 14 | 0.0466  | 0.137 | Inf | 0.340  | 1.0000 |
| ## | 5 - 15 | -0.1044 | 0.137 | Inf | -0.760 | 1.0000 |
| ## | 6 - 7  | 0.1569  | 0.135 | Inf | 1.160  | 0.9981 |
| ## | 6 - 8  | -0.0144 | 0.136 | Inf | -0.106 | 1.0000 |
| ## | 6 - 9  | -0.0569 | 0.138 | Inf | -0.413 | 1.0000 |
| ## | 6 - 10 | 0.0113  | 0.136 | Inf | 0.083  | 1.0000 |

```

## 6 - 11    -0.0584 0.138 Inf -0.423 1.0000
## 6 - 12    -0.1291 0.137 Inf -0.941 0.9998
## 6 - 13    -0.2013 0.138 Inf -1.456 0.9820
## 6 - 14     0.0681 0.138 Inf  0.493 1.0000
## 6 - 15    -0.0829 0.139 Inf -0.599 1.0000
## 7 - 8     -0.1714 0.136 Inf -1.262 0.9955
## 7 - 9     -0.2138 0.136 Inf -1.568 0.9654
## 7 - 10    -0.1456 0.135 Inf -1.078 0.9992
## 7 - 11    -0.2153 0.136 Inf -1.579 0.9634
## 7 - 12    -0.2860 0.136 Inf -2.101 0.7347
## 7 - 13    -0.3582 0.137 Inf -2.608 0.3642
## 7 - 14    -0.0888 0.138 Inf -0.644 1.0000
## 7 - 15    -0.2399 0.138 Inf -1.743 0.9197
## 8 - 9     -0.0424 0.137 Inf -0.310 1.0000
## 8 - 10     0.0258 0.137 Inf  0.189 1.0000
## 8 - 11    -0.0439 0.138 Inf -0.319 1.0000
## 8 - 12    -0.1147 0.136 Inf -0.841 1.0000
## 8 - 13    -0.1868 0.138 Inf -1.352 0.9911
## 8 - 14     0.0825 0.138 Inf  0.597 1.0000
## 8 - 15    -0.0685 0.138 Inf -0.496 1.0000
## 9 - 10     0.0682 0.137 Inf  0.499 1.0000
## 9 - 11    -0.0015 0.138 Inf -0.011 1.0000
## 9 - 12    -0.0722 0.137 Inf -0.526 1.0000
## 9 - 13    -0.1444 0.139 Inf -1.039 0.9994
## 9 - 14     0.1250 0.139 Inf  0.900 0.9999
## 9 - 15    -0.0260 0.139 Inf -0.187 1.0000
## 10 - 11   -0.0697 0.137 Inf -0.508 1.0000
## 10 - 12   -0.1405 0.136 Inf -1.030 0.9995
## 10 - 13   -0.2126 0.138 Inf -1.543 0.9700
## 10 - 14    0.0567 0.138 Inf  0.411 1.0000
## 10 - 15   -0.0943 0.138 Inf -0.684 1.0000
## 11 - 12   -0.0708 0.138 Inf -0.514 1.0000
## 11 - 13   -0.1429 0.140 Inf -1.023 0.9995
## 11 - 14    0.1264 0.139 Inf  0.908 0.9999
## 11 - 15   -0.0246 0.139 Inf -0.177 1.0000
## 12 - 13   -0.0721 0.138 Inf -0.521 1.0000
## 12 - 14    0.1972 0.138 Inf  1.432 0.9846
## 12 - 15    0.0462 0.138 Inf  0.334 1.0000
## 13 - 14    0.2693 0.139 Inf  1.931 0.8378
## 13 - 15    0.1183 0.140 Inf  0.847 1.0000
## 14 - 15   -0.1510 0.139 Inf -1.084 0.9991
##

```

```

## Results are averaged over the levels of: BreedGroup, Play
## Results are given on the log (not the response) scale.
## P value adjustment: tukey method for comparing a family of 15 estimates

```

### #Figures

```

library(survival)
library(survminer)

```

```

CI <- survfit(Surv(LEC, Event) ~ CI_fig, data = EC_data)
ggsurvplot(CI, fun="event", conf.int = T, censor = F, xlim=c(0,15),break.x.by=5,
  linetype = c("strata"),
  xlab="Latency to form eye contact (s)",ylab="Ratio of dogs that formed \n eye co
ntact",
  legend.title = "Cephalic index", legend.labs = c("43.5-49.9", "50.0-55.3", "55.4-
74.7"),

```

```
font.x=c(12),font.y=c(12),font.tickslab=c(10),font.legend=c(10),
ggtheme = theme_bw())
```

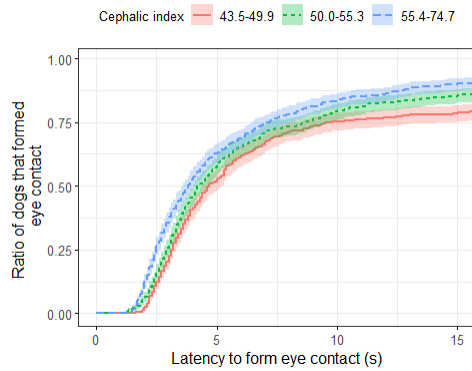

```
Breed <- survfit(Surv(LEC, Event) ~ BreedGroup, data = EC_data)
ggsurvplot(Breed, fun="event", conf.int = T, censor = F, xlim=c(0,15),break.x.by=5,
  linetype = c("strata"),
  xlab="Latency to form eye contact (s)",ylab="Ratio of dogs that formed \n eye co
ntact",
  legend.title = "Breed function", legend.labs = c("Cooperative", "Mixed", "Non-coo
perative"),
  font.x=c(12),font.y=c(12),font.tickslab=c(10),font.legend=c(10),
  ggtheme = theme_bw())
```

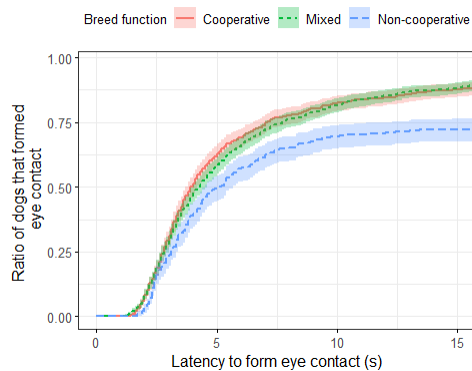

```
Age <- survfit(Surv(LEC, Event) ~ Age_fig, data = EC_data)
ggsurvplot(Age, fun="event", conf.int = T, censor = F, xlim=c(0,15),break.x.by=5,
  linetype = c("strata"),
  xlab="Latency to form eyecontact (s)",ylab="Ratio of dogs that formed \n eye co
ntact",
  legend.title = "Age (month)", legend.labs = c('31.4-79.4','79.8-126.1','126.8-17
4.5'),
  font.x=c(12),font.y=c(12),font.tickslab=c(10),font.legend=c(10),
  ggtheme = theme_bw())
```

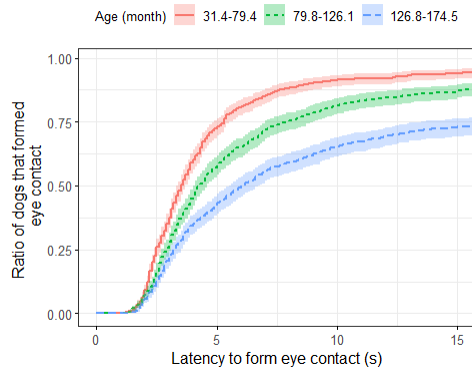

```
Play <- survfit(Surv(LEC, Event) ~ Play, data = EC_data)
ggsurvplot(Play, fun="event", conf.int = T, censor = F, xlim=c(0,15), break.x.by=5,
  linetype = c("strata"),
  xlab="Latency to form eye contact (s)", ylab="Ratio of dogs that formed \n eye co
ntact",
  legend.title = "Human-directed playfulness", legend.labs = c("Low", "High"),
  font.x=c(12), font.y=c(12), font.tickslab=c(10), font.legend=c(10),
  ggtheme = theme_bw())
```

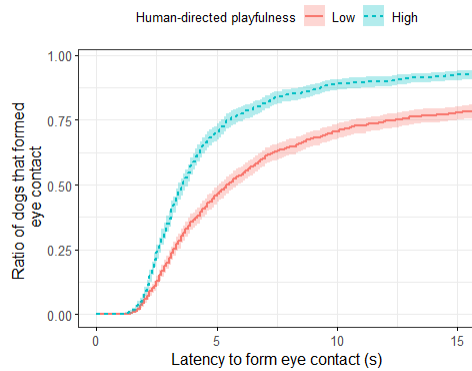

### #Effect of experimenter

```
EC_mod_E <- update(EC_mod, ~. + Exp)
anova(EC_mod, EC_mod_E)
```

```
## Analysis of Deviance Table
```

```
## Cox model: response is Surv(LEC, Event)
```

```
## Model 1: ~CI + BreedGroup + Age + Play + Trial + (1 | DogID)
```

```
## Model 2: ~CI + BreedGroup + Age + Play + Trial + (1 | DogID) + Exp
```

```
## loglik Chisq Df P(>|Chi|)
```

```
## 1 -10852
```

```
## 2 -10842 20.6 7 0.0044 **
```

```
## ---
```

```
## Signif. codes: 0 '***' 0.001 '**' 0.01 '*' 0.05 '.' 0.1 ' ' 1
```

```
pairs(emmeans(EC_mod_E, ~Exp))
```

```
## contrast estimate SE df z.ratio p.value
## BR - BZs 0.259 0.560 Inf 0.463 0.9998
## BR - DA 0.660 0.706 Inf 0.934 0.9827
## BR - EA -0.106 0.779 Inf -0.137 1.0000
## BR - HV -0.233 0.660 Inf -0.353 1.0000
## BR - MS -0.727 0.640 Inf -1.136 0.9489
## BR - SB 0.101 0.576 Inf 0.175 1.0000
## BR - SzD -0.385 0.576 Inf -0.669 0.9978
## BZs - DA 0.401 0.514 Inf 0.780 0.9942
```

```

## BZs - EA      -0.366 0.626 Inf -0.585 0.9991
## BZs - HV      -0.493 0.495 Inf -0.995 0.9752
## BZs - MS      -0.986 0.488 Inf -2.022 0.4666
## BZs - SB      -0.158 0.394 Inf -0.402 0.9999
## BZs - SzD     -0.645 0.422 Inf -1.528 0.7925
## DA - EA      -0.767 0.669 Inf -1.146 0.9466
## DA - HV      -0.893 0.626 Inf -1.428 0.8447
## DA - MS      -1.387 0.641 Inf -2.163 0.3741
## DA - SB      -0.559 0.560 Inf -0.998 0.9749
## DA - SzD     -1.046 0.594 Inf -1.759 0.6478
## EA - HV      -0.127 0.690 Inf -0.184 1.0000
## EA - MS      -0.620 0.717 Inf -0.865 0.9890
## EA - SB       0.207 0.634 Inf 0.327 1.0000
## EA - SzD     -0.279 0.683 Inf -0.408 0.9999
## HV - MS      -0.494 0.604 Inf -0.818 0.9922
## HV - SB       0.334 0.538 Inf 0.621 0.9986
## HV - SzD     -0.152 0.544 Inf -0.280 1.0000
## MS - SB       0.828 0.509 Inf 1.626 0.7344
## MS - SzD     0.342 0.500 Inf 0.683 0.9974
## SB - SzD     -0.486 0.444 Inf -1.096 0.9578
##
## Results are averaged over the levels of: BreedGroup, Play, Trial
## Results are given on the log (not the response) scale.
## P value adjustment: tukey method for comparing a family of 8 estimates

#Effect of sex
EC_mod_S <- update(EC_mod, .~. + Sex)
anova(EC_mod, EC_mod_S)

## Analysis of Deviance Table
## Cox model: response is Surv(LEC, Event)
## Model 1: ~CI + BreedGroup + Age + Play + Trial + (1 | DogID)
## Model 2: ~CI + BreedGroup + Age + Play + Trial + (1 | DogID) + Sex
##   loglik Chisq Df P(>|Chi|)
## 1 -10852
## 2 -10853 2.35 1 0.13

#Effect of neuter status
EC_mod_N <- update(EC_mod, .~. + Neutered)
anova(EC_mod, EC_mod_N)

## Analysis of Deviance Table
## Cox model: response is Surv(LEC, Event)
## Model 1: ~CI + BreedGroup + Age + Play + Trial + (1 | DogID)
## Model 2: ~CI + BreedGroup + Age + Play + Trial + (1 | DogID) + Neutered
##   loglik Chisq Df P(>|Chi|)
## 1 -10852
## 2 -10852 0.19 1 0.67

#Effect of weight
Weight_data <- subset(EC_data, !is.na(Weight)) # delete NAs
Weight_data$DogID <- factor(Weight_data$DogID)

EC_mod_W0 <- coxme(Surv(LEC, Event) ~ CI + BreedGroup + Age + Play + Trial + (1|DogID), data = Weight_data) # final model without weight NAs
EC_mod_W <- update(EC_mod_W0, .~. + Weight)
anova(EC_mod_W0, EC_mod_W)

```



```

## Analysis of Deviance Table
## Cox model: response is Surv(LEC, Event)
## Model 1: ~CI + BreedGroup + Age + Play + Trial + (1 | DogID)
## Model 2: ~CI + BreedGroup + Age + Play + Trial + (1 | DogID) + Weight
##   loglik Chisq Df P(>|Chi|)
## 1 -10740
## 2 -10740  0.22  1      0.64

#Effect of previous dog school attendance
DogSchool_data <- subset(EC_data, !is.na(DogSchool)) # delete NAs
DogSchool_data$DogID <- factor(DogSchool_data$DogID)

EC_mod_DS0 <- coxme(Surv(LEC, Event) ~ CI + BreedGroup + Age + Play + Trial + (1|DogID), da
ta = DogSchool_data) # final model without dog school NAs
EC_mod_DS <- update(EC_mod_DS0, .~. + DogSchool)
anova(EC_mod_DS0, EC_mod_DS)

## Analysis of Deviance Table
## Cox model: response is Surv(LEC, Event)
## Model 1: ~CI + BreedGroup + Age + Play + Trial + (1 | DogID)
## Model 2: ~CI + BreedGroup + Age + Play + Trial + (1 | DogID) + DogSchool
##   loglik Chisq Df P(>|Chi|)
## 1 -9565
## 2 -9568  6.78  1      0.0092 **
## ---
## Signif. codes:  0 '***' 0.001 '**' 0.01 '*' 0.05 '.' 0.1 ' ' 1

#Interactions with trial
EC_mod_CI <- update(EC_mod, .~. + CI*Trial)
anova(EC_mod, EC_mod_CI)

## Analysis of Deviance Table
## Cox model: response is Surv(LEC, Event)
## Model 1: ~CI + BreedGroup + Age + Play + Trial + (1 | DogID)
## Model 2: ~CI + BreedGroup + Age + Play + Trial + (1 | DogID) + CI:Trial
##   loglik Chisq Df P(>|Chi|)
## 1 -10852
## 2 -10846  12 14      0.61

EC_mod_Breed <- update(EC_mod, .~. + BreedGroup*Trial)
anova(EC_mod, EC_mod_Breed)

## Analysis of Deviance Table
## Cox model: response is Surv(LEC, Event)
## Model 1: ~CI + BreedGroup + Age + Play + Trial + (1 | DogID)
## Model 2: ~CI + BreedGroup + Age + Play + Trial + (1 | DogID) + BreedGroup:Trial
##   loglik Chisq Df P(>|Chi|)
## 1 -10852
## 2 -10842  20.3 28      0.85

EC_mod_Age <- update(EC_mod, .~. + Age*Trial)
anova(EC_mod, EC_mod_Age)

## Analysis of Deviance Table
## Cox model: response is Surv(LEC, Event)
## Model 1: ~CI + BreedGroup + Age + Play + Trial + (1 | DogID)
## Model 2: ~CI + BreedGroup + Age + Play + Trial + (1 | DogID) + Age:Trial
##   loglik Chisq Df P(>|Chi|)

```

```
## 1 -10852
## 2 -10843 18.8 14 0.17

EC_mod_Play <- update(EC_mod, .~. + Play*Trial)
anova(EC_mod, EC_mod_Play)

## Analysis of Deviance Table
## Cox model: response is Surv(LEC, Event)
## Model 1: ~CI + BreedGroup + Age + Play + Trial + (1 | DogID)
## Model 2: ~CI + BreedGroup + Age + Play + Trial + (1 | DogID) + Play:Trial
## loglik Chisq Df P(>|Chi|)
## 1 -10852
## 2 -10849 6.85 14 0.94
```

## b. Sociability tests

### i. Greeting

```
library(MuMIn)

## Registered S3 methods overwritten by 'MuMIn':
## method from
## formula.coxme coxme
## logLik.coxme coxme
## logLik.lmekin coxme

options(na.action = na.fail)

Greet_model <- glm(Greet ~ CI + BreedGroup + Age, family=binomial(link="logit"), data=Soc_d
ata)
dredge(Greet_model)

## Fixed term is "(Intercept)"

## Global model call: glm(formula = Greet ~ CI + BreedGroup + Age, family = binomial(link =
"logit"),
## data = Soc_data)
## ---
## Model selection table
## (Intrc) Age BrdGr CI df logLik AICc delta weight
## 2 1.31300 -0.009536 2 -82.86 169.8 0.00 0.263
## 4 2.03200 -0.011100 + 4 -80.79 169.9 0.08 0.252
## 6 -0.06499 -0.010130 0.02690 3 -82.51 171.2 1.39 0.131
## 8 0.52800 -0.011730 + 0.02945 5 -80.37 171.2 1.41 0.130
## 1 0.33920 1 -84.87 171.8 1.95 0.099
## 3 0.80230 + 3 -83.31 172.8 3.00 0.059
## 5 -0.57630 0.01712 2 -84.72 173.5 3.71 0.041
## 7 -0.19990 + 0.01885 4 -83.13 174.6 4.77 0.024
## Models ranked by AICc(x)

Greet_FIN_model <- glm(Greet ~ Age, family=binomial(link="logit"), data=Soc_data)
summary(Greet_FIN_model)

##
## Call:
## glm(formula = Greet ~ Age, family = binomial(link = "logit"),
## data = Soc_data)
##
```

```

## Deviance Residuals:
##      Min       1Q   Median       3Q      Max
## -1.605  -1.220   0.816   1.074   1.284
##
## Coefficients:
##              Estimate Std. Error z value Pr(>|z|)
## (Intercept)  1.31340    0.53521   2.45    0.014 *
## Age         -0.00954    0.00485  -1.97    0.049 *
## ---
## Signif. codes:  0 '***' 0.001 '**' 0.01 '*' 0.05 '.' 0.1 ' ' 1
##
## (Dispersion parameter for binomial family taken to be 1)
##
##      Null deviance: 169.74  on 124  degrees of freedom
## Residual deviance: 165.73  on 123  degrees of freedom
## AIC: 169.7
##
## Number of Fisher Scoring iterations: 4

ggplot(Soc_data_fig, aes(Age, Greet))+
  ylim(0,1)+
  geom_smooth(method = "glm", method.args = list(family = "binomial"),
             color="black",size=0.6, fill="turquoise3")+
  xlab("Age (month)") + ylab("Probability of \n greeting the experimenter")+
  theme_bw()+
  theme(axis.text.x = element_text(size = 10), axis.title.x = element_text(size = 12),
        axis.text.y = element_text(size = 10), axis.title.y = element_text(size = 12))

## `geom_smooth()` using formula 'y ~ x'

```

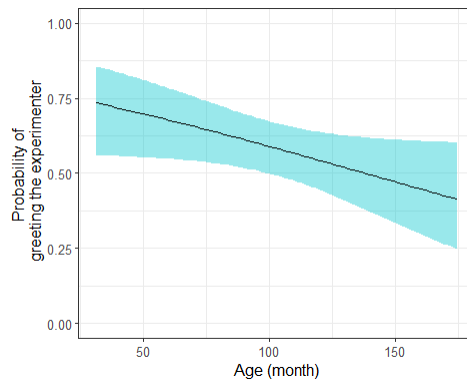

## ii. Playfulness

```

Play_model <- glm(Play ~ CI + BreedGroup + Age, family=binomial(link="logit"), data=Soc_data)
dredge(Play_model)

## Fixed term is "(Intercept)"

## Global model call: glm(formula = Play ~ CI + BreedGroup + Age, family = binomial(link =
"logit"),
##   data = Soc_data)
## ---
## Model selection table
##   (Intrc)   Age BrdGr      CI df logLik  AICc delta weight
## 2  1.86700 -0.01932      2  -78.69 161.5  0.00  0.488
## 4  2.50800 -0.02104      4  -77.23 162.8  1.31  0.254

```

```
## 6 1.76800 -0.01937      0.001930 3 -78.69 163.6 2.10 0.171
## 8 2.27400 -0.02116      + 0.004612 5 -77.22 164.9 3.46 0.087
## 1 -0.08004
## 5 0.73900      -0.015300 2 -86.42 176.9 15.45 0.000
## 3 0.19110      +
## 7 0.97380      + -0.014690 4 -85.75 179.8 18.34 0.000
## Models ranked by AICc(x)
```

```
Play_FIN_model <- glm(Play ~ Age, family=binomial(link="logit"), data=Soc_data)
summary(Play_FIN_model)
```

```
##
## Call:
## glm(formula = Play ~ Age, family = binomial(link = "logit"),
##      data = Soc_data)
##
## Deviance Residuals:
##      Min       1Q   Median       3Q      Max
## -1.700  -0.968  -0.697   1.042   1.753
##
## Coefficients:
##              Estimate Std. Error z value Pr(>|z|)
## (Intercept)  1.86710     0.55794   3.35  0.00082 ***
## Age         -0.01932     0.00518  -3.73  0.00019 ***
## ---
## Signif. codes:  0 '***' 0.001 '**' 0.01 '*' 0.05 '.' 0.1 ' ' 1
##
## (Dispersion parameter for binomial family taken to be 1)
##
##      Null deviance: 173.09  on 124  degrees of freedom
## Residual deviance: 157.39  on 123  degrees of freedom
## AIC: 161.4
##
## Number of Fisher Scoring iterations: 4
```

```
ggplot(Soc_data_fig, aes(Age, Play))+
  ylim(0,1) +
  geom_smooth(method = "glm", method.args = list(family = "binomial"),
             color="black",size=0.6, fill="turquoise3")+
  xlab("Age (month)") + ylab("Probability of \n playing with the experimenter")+
  theme_bw()+
  theme(axis.text.x = element_text(size = 10), axis.title.x = element_text(size = 12),
        axis.text.y = element_text(size = 10), axis.title.y = element_text(size = 12))
## `geom_smooth()` using formula 'y ~ x'
```

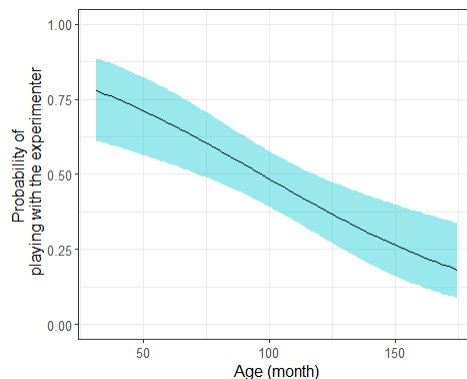

### 3. Trial analysis

#### a. 1. eye contact

```
EClec_data <- subset(EC_data, Trial==1)

EC_mod <- coxme(Surv(LEC, Event) ~ Age + Play + (1|DogID), data = EClec_data)
summary(EC_mod)

## Cox mixed-effects model fit by maximum likelihood
## Data: EClec_data
## events, n = 123, 125
## Iterations= 2 15
##              NULL Integrated Fitted
## Log-likelihood -481.2      -471.9 -455.8
##
##              Chisq  df      p  AIC  BIC
## Integrated loglik 18.48  3.00 3.496e-04 12.48  4.05
## Penalized loglik 50.84 16.92 2.973e-05 17.00 -30.58
##
## Model: Surv(LEC, Event) ~ Age + Play + (1 | DogID)
## Fixed coefficients
##      coef exp(coef) se(coef)      z      p
## Age  -0.007437    0.9926 0.002872 -2.59 0.0096
## Play  0.524260    1.6892 0.223974  2.34 0.0190
##
## Random effects
## Group Variable  Std Dev Variance
## DogID Intercept 0.3997  0.1598
```

#### b. 1-2. eye contact

```
EClec_data <- subset(EC_data, Trial==1 | Trial==2)
EClec_data$Trial <- factor(EClec_data$Trial, levels = c('1','2'))

EC_mod <- coxme(Surv(LEC, Event) ~ BreedGroup + Age + Play + (1|DogID), data = EClec_data)
summary(EC_mod)

## Cox mixed-effects model fit by maximum likelihood
## Data: EClec_data
## events, n = 243, 250
## Iterations= 7 46
##              NULL Integrated Fitted
## Log-likelihood -1126      -1079 -972.4
##
##              Chisq  df p  AIC  BIC
## Integrated loglik 93.18  5.00 0  83.18  65.71
## Penalized loglik 306.30 80.76 0 144.79 -137.30
##
## Model: Surv(LEC, Event) ~ BreedGroup + Age + Play + (1 | DogID)
## Fixed coefficients
##      coef exp(coef) se(coef)      z      p
## BreedGroupMixed -0.15807    0.8538 0.266786 -0.59 5.5e-01
## BreedGroupNoncoop -1.08842    0.3367 0.327420 -3.32 8.9e-04
## Age              -0.01542    0.9847 0.003245 -4.75 2.0e-06
## Play              0.56497    1.7594 0.249283  2.27 2.3e-02
```

```
##
## Random effects
## Group Variable Std Dev Variance
## DogID Intercept 1.012 1.024

pairs(emmeans(EC_mod, ~BreedGroup))

## contrast estimate SE df z.ratio p.value
## Coop - Mixed 0.158 0.267 Inf 0.592 0.8242
## Coop - Noncoop 1.088 0.327 Inf 3.324 0.0026
## Mixed - Noncoop 0.930 0.303 Inf 3.069 0.0061
##
## Results are averaged over the levels of: Play
## Results are given on the log (not the response) scale.
## P value adjustment: tukey method for comparing a family of 3 estimates
```

### c. 1-3. eye contact

```
EClec_data <- subset(EC_data, Trial==1 | Trial==2 | Trial==3)
EClec_data$Trial <- factor(EClec_data$Trial, levels = c('1', '2', '3'))

EC_mod <- coxme(Surv(LEC, Event) ~ BreedGroup + Age + (1|DogID), data = EClec_data)
summary(EC_mod)

## Cox mixed-effects model fit by maximum likelihood
## Data: EClec_data
## events, n = 361, 375
## Iterations= 18 106
## NULL Integrated Fitted
## Log-likelihood -1826 -1725 -1561
##
## Chisq df p AIC BIC
## Integrated loglik 202.6 4.0 0 194.6 179.03
## Penalized loglik 530.5 103.9 0 322.7 -81.19
##
## Model: Surv(LEC, Event) ~ BreedGroup + Age + (1 | DogID)
## Fixed coefficients
## coef exp(coef) se(coef) z p
## BreedGroupMixed -0.27227 0.7617 0.311295 -0.87 3.8e-01
## BreedGroupNoncoop -1.50989 0.2209 0.377706 -4.00 6.4e-05
## Age -0.02038 0.9798 0.003341 -6.10 1.1e-09
##
## Random effects
## Group Variable Std Dev Variance
## DogID Intercept 1.332 1.776

pairs(emmeans(EC_mod, ~BreedGroup))

## contrast estimate SE df z.ratio p.value
## Coop - Mixed 0.272 0.311 Inf 0.875 0.6563
## Coop - Noncoop 1.510 0.378 Inf 3.998 0.0002
## Mixed - Noncoop 1.238 0.357 Inf 3.471 0.0015
##
## Results are given on the log (not the response) scale.
## P value adjustment: tukey method for comparing a family of 3 estimates
```

## d. 1-4. eye contact

```
EClec_data <- subset(EC_data, Trial==1 | Trial==2 | Trial==3 | Trial==4)
EClec_data$Trial <- factor(EClec_data$Trial, levels = c('1','2','3','4'))

EC_mod <- coxme(Surv(LEC, Event) ~ Trial + CI + BreedGroup + Age + Play + (1|DogID), data =
EClec_data)
summary(EC_mod)

## Cox mixed-effects model fit by maximum likelihood
## Data: EClec_data
## events, n = 479, 500
## Iterations= 14 87
##          NULL Integrated Fitted
## Log-likelihood -2566          -2411  -2231
##
##          Chisq    df p    AIC    BIC
## Integrated loglik 310.1  9.0 0 292.1 254.52
## Penalized loglik 669.7 111.2 0 447.2 -16.92
##
## Model: Surv(LEC, Event) ~ Trial + CI + BreedGroup + Age + Play + (1 | DogID)
## Fixed coefficients
##          coef exp(coef) se(coef)      z      p
## Trial2      -0.06040   0.9414 0.144802 -0.42 6.8e-01
## Trial3       0.19235   1.2121 0.138904  1.38 1.7e-01
## Trial4       0.33062   1.3918 0.140583  2.35 1.9e-02
## CI          0.04840   1.0496 0.022457  2.16 3.1e-02
## BreedGroupMixed -0.09542   0.9090 0.310150 -0.31 7.6e-01
## BreedGroupNoncoop -1.33061   0.2643 0.374501 -3.55 3.8e-04
## Age         -0.01667   0.9835 0.003631 -4.59 4.4e-06
## Play1       0.58157   1.7889 0.282434  2.06 3.9e-02
##
## Random effects
## Group Variable Std Dev Variance
## DogID Intercept 1.319  1.741

pairs(emmeans(EC_mod, ~Trial))

## contrast estimate SE df z.ratio p.value
## 1 - 2      0.0604 0.145 Inf  0.417 0.9756
## 1 - 3     -0.1923 0.139 Inf -1.385 0.5089
## 1 - 4     -0.3306 0.141 Inf -2.352 0.0866
## 2 - 3     -0.2528 0.146 Inf -1.737 0.3045
## 2 - 4     -0.3910 0.147 Inf -2.669 0.0382
## 3 - 4     -0.1383 0.144 Inf -0.962 0.7708
##
## Results are averaged over the levels of: BreedGroup, Play
## Results are given on the log (not the response) scale.
## P value adjustment: tukey method for comparing a family of 4 estimates

pairs(emmeans(EC_mod, ~BreedGroup))

## contrast estimate SE df z.ratio p.value
## Coop - Mixed      0.0954 0.310 Inf  0.308 0.9492
## Coop - Noncoop    1.3306 0.374 Inf  3.553 0.0011
## Mixed - Noncoop   1.2352 0.348 Inf  3.552 0.0011
##
```

```
## Results are averaged over the levels of: Trial, Play
## Results are given on the log (not the response) scale.
## P value adjustment: tukey method for comparing a family of 3 estimates
```

### e. 1-5. eye contact

```
EClec_data <- subset(EC_data, Trial==1 | Trial==2 | Trial==3 | Trial==4 | Trial==5)
EClec_data$Trial <- factor(EClec_data$Trial, levels = c('1', '2', '3', '4', '5'))
```

```
EC_mod <- coxme(Surv(LEC, Event) ~ Trial + CI + BreedGroup + Age + (1|DogID), data = EClec_data)
summary(EC_mod)
```

```
## Cox mixed-effects model fit by maximum likelihood
```

```
## Data: EClec_data
```

```
## events, n = 596, 625
```

```
## Iterations= 19 111
```

```
## NULL Integrated Fitted
```

```
## Log-likelihood -3331 -3126 -2932
```

```
##
```

```
## Chisq df p AIC BIC
```

```
## Integrated loglik 411.2 9.0 0 393.2 353.67
```

```
## Penalized loglik 798.4 115.2 0 567.9 62.04
```

```
##
```

```
## Model: Surv(LEC, Event) ~ Trial + CI + BreedGroup + Age + (1 | DogID)
```

```
## Fixed coefficients
```

```
## coef exp(coef) se(coef) z p
```

```
## Trial2 -0.01269 0.9874 0.142626 -0.09 9.3e-01
```

```
## Trial3 0.22101 1.2473 0.138264 1.60 1.1e-01
```

```
## Trial4 0.36279 1.4373 0.139702 2.60 9.4e-03
```

```
## Trial5 0.50808 1.6621 0.141928 3.58 3.4e-04
```

```
## CI 0.04910 1.0503 0.022342 2.20 2.8e-02
```

```
## BreedGroupMixed -0.16624 0.8468 0.310764 -0.53 5.9e-01
```

```
## BreedGroupNoncoop -1.36759 0.2547 0.368909 -3.71 2.1e-04
```

```
## Age -0.01949 0.9807 0.003137 -6.21 5.1e-10
```

```
##
```

```
## Random effects
```

```
## Group Variable Std Dev Variance
```

```
## DogID Intercept 1.331 1.772
```

```
pairs(emmeans(EC_mod, ~Trial))
```

```
## contrast estimate SE df z.ratio p.value
```

```
## 1 - 2 0.0127 0.143 Inf 0.089 1.0000
```

```
## 1 - 3 -0.2210 0.138 Inf -1.598 0.4983
```

```
## 1 - 4 -0.3628 0.140 Inf -2.597 0.0709
```

```
## 1 - 5 -0.5081 0.142 Inf -3.580 0.0032
```

```
## 2 - 3 -0.2337 0.143 Inf -1.633 0.4761
```

```
## 2 - 4 -0.3755 0.144 Inf -2.609 0.0686
```

```
## 2 - 5 -0.5208 0.144 Inf -3.623 0.0027
```

```
## 3 - 4 -0.1418 0.142 Inf -0.996 0.8575
```

```
## 3 - 5 -0.2871 0.142 Inf -2.028 0.2525
```

```
## 4 - 5 -0.1453 0.142 Inf -1.023 0.8450
```

```
##
```

```
## Results are averaged over the levels of: BreedGroup
```

```
## Results are given on the log (not the response) scale.
```

```
## P value adjustment: tukey method for comparing a family of 5 estimates
```



```
pairs(emmeans(EC_mod, ~BreedGroup))
```

```
## contrast      estimate    SE  df z.ratio p.value
## Coop - Mixed      0.166 0.311 Inf  0.535  0.8541
## Coop - Noncoop    1.368 0.369 Inf  3.707  0.0006
## Mixed - Noncoop   1.201 0.351 Inf  3.420  0.0018
##
## Results are averaged over the levels of: Trial
## Results are given on the log (not the response) scale.
## P value adjustment: tukey method for comparing a family of 3 estimates
```

## f. 1-6. eye contact

```
EClec_data <- subset(EC_data, Trial==1 | Trial==2 | Trial==3 | Trial==4 | Trial==5 | Trial=
```

```
=6)
EClec_data$Trial <- factor(EClec_data$Trial, levels = c('1','2','3','4','5','6'))
```

```
EC_mod <- coxme(Surv(LEC, Event) ~ Trial + CI + BreedGroup + Age + (1|DogID), data = EClec_
```

```
summary(EC_mod)
```

```
## Cox mixed-effects model fit by maximum likelihood
```

```
## Data: EClec_data
```

```
## events, n = 713, 750
```

```
## Iterations= 14 83
```

```
##          NULL Integrated Fitted
```

```
## Log-likelihood -4120      -3852  -3643
```

```
##
```

```
##          Chisq    df p    AIC    BIC
```

```
## Integrated loglik 535.6  10.0 0 515.6 469.9
```

```
## Penalized loglik 953.2 118.8 0 715.5 172.4
```

```
##
```

```
## Model: Surv(LEC, Event) ~ Trial + CI + BreedGroup + Age + (1 | DogID)
```

```
## Fixed coefficients
```

```
##          coef exp(coef) se(coef)      z      p
```

```
## Trial2      -0.008425    0.9916 0.142333 -0.06 9.5e-01
```

```
## Trial3       0.208226    1.2315 0.138123  1.51 1.3e-01
```

```
## Trial4       0.410036    1.5069 0.138786  2.95 3.1e-03
```

```
## Trial5       0.532487    1.7032 0.140977  3.78 1.6e-04
```

```
## Trial6       0.662407    1.9395 0.139999  4.73 2.2e-06
```

```
## CI          0.054399    1.0559 0.023252  2.34 1.9e-02
```

```
## BreedGroupMixed -0.195173    0.8227 0.325805 -0.60 5.5e-01
```

```
## BreedGroupNoncoop -1.330911    0.2642 0.381251 -3.49 4.8e-04
```

```
## Age         -0.018997    0.9812 0.003128 -6.07 1.3e-09
```

```
##
```

```
## Random effects
```

```
## Group Variable Std Dev Variance
```

```
## DogID Intercept 1.383    1.913
```

```
pairs(emmeans(EC_mod, ~Trial))
```

```
## contrast estimate    SE  df z.ratio p.value
```

```
## 1 - 2      0.0084 0.142 Inf  0.059 1.0000
```

```
## 1 - 3     -0.2082 0.138 Inf -1.508 0.6594
```

```
## 1 - 4     -0.4100 0.139 Inf -2.954 0.0370
```

```
## 1 - 5     -0.5325 0.141 Inf -3.777 0.0022
```

```
## 1 - 6     -0.6624 0.140 Inf -4.732 <.0001
```

```
## 2 - 3      -0.2167 0.142 Inf -1.524 0.6487
## 2 - 4      -0.4185 0.143 Inf -2.935 0.0391
## 2 - 5      -0.5409 0.142 Inf -3.796 0.0020
## 2 - 6      -0.6708 0.144 Inf -4.666 <.0001
## 3 - 4      -0.2018 0.141 Inf -1.429 0.7096
## 3 - 5      -0.3243 0.141 Inf -2.305 0.1918
## 3 - 6      -0.4542 0.142 Inf -3.204 0.0170
## 4 - 5      -0.1225 0.140 Inf -0.872 0.9533
## 4 - 6      -0.2524 0.139 Inf -1.816 0.4550
## 5 - 6      -0.1299 0.140 Inf -0.925 0.9401
##
## Results are averaged over the levels of: BreedGroup
## Results are given on the log (not the response) scale.
## P value adjustment: tukey method for comparing a family of 6 estimates

pairs(emmeans(EC_mod, ~BreedGroup))

## contrast      estimate      SE df z.ratio p.value
## Coop - Mixed      0.195 0.326 Inf 0.599 0.8206
## Coop - Noncoop    1.331 0.381 Inf 3.491 0.0014
## Mixed - Noncoop    1.136 0.365 Inf 3.110 0.0053
##
## Results are averaged over the levels of: Trial
## Results are given on the log (not the response) scale.
## P value adjustment: tukey method for comparing a family of 3 estimates
```

## g. 1-7. eye contact

```
EClec_data <- subset(EC_data, Trial==1 | Trial==2 | Trial==3 | Trial==4 | Trial==5 | Trial=
=6 | Trial==7)
EClec_data$Trial <- factor(EClec_data$Trial, levels = c('1','2','3','4','5','6','7'))

EC_mod <- coxme(Surv(LEC, Event) ~ Trial + CI + BreedGroup + Age + (1|DogID), data = EClec_
data)
summary(EC_mod)

## Cox mixed-effects model fit by maximum likelihood
## Data: EClec_data
## events, n = 830, 875
## Iterations= 9 58
##
##          NULL Integrated Fitted
## Log-likelihood -4928      -4602  -4383
##
##          Chisq    df p    AIC    BIC
## Integrated loglik  651 11.0 0 629.0 577.1
## Penalized loglik  1088 121.2 0 846.1 273.9
##
## Model: Surv(LEC, Event) ~ Trial + CI + BreedGroup + Age + (1 | DogID)
## Fixed coefficients
##          coef exp(coef) se(coef)      z      p
## Trial2      0.02343    1.0237 0.14116 0.17 8.7e-01
## Trial3      0.22475    1.2520 0.13782 1.63 1.0e-01
## Trial4      0.44351    1.5582 0.13763 3.22 1.3e-03
## Trial5      0.58073    1.7873 0.14047 4.13 3.6e-05
## Trial6      0.71580    2.0458 0.13966 5.13 3.0e-07
## Trial7      0.44704    1.5637 0.14108 3.17 1.5e-03
## CI          0.05208    1.0535 0.02351 2.22 2.7e-02
```

```
## BreedGroupMixed    -0.20801    0.8122  0.32723 -0.64 5.2e-01
## BreedGroupNoncoop -1.32032    0.2670  0.38502 -3.43 6.1e-04
## Age                -0.01874    0.9814  0.00309 -6.07 1.3e-09
##
## Random effects
## Group Variable Std Dev Variance
## DogID Intercept 1.390    1.931
```

```
pairs(emmeans(EC_mod, ~Trial))
```

```
## contrast estimate SE df z.ratio p.value
## 1 - 2      -0.0234 0.141 Inf -0.166 1.0000
## 1 - 3      -0.2248 0.138 Inf -1.631 0.6623
## 1 - 4      -0.4435 0.138 Inf -3.222 0.0217
## 1 - 5      -0.5807 0.140 Inf -4.134 0.0007
## 1 - 6      -0.7158 0.140 Inf -5.125 <.0001
## 1 - 7      -0.4470 0.141 Inf -3.169 0.0257
## 2 - 3      -0.2013 0.141 Inf -1.428 0.7867
## 2 - 4      -0.4201 0.140 Inf -2.992 0.0441
## 2 - 5      -0.5573 0.141 Inf -3.958 0.0015
## 2 - 6      -0.6924 0.142 Inf -4.873 <.0001
## 2 - 7      -0.4236 0.141 Inf -3.001 0.0429
## 3 - 4      -0.2188 0.140 Inf -1.568 0.7031
## 3 - 5      -0.3560 0.140 Inf -2.541 0.1447
## 3 - 6      -0.4911 0.141 Inf -3.491 0.0087
## 3 - 7      -0.2223 0.141 Inf -1.578 0.6968
## 4 - 5      -0.1372 0.139 Inf -0.988 0.9568
## 4 - 6      -0.2723 0.137 Inf -1.981 0.4267
## 4 - 7      -0.0035 0.139 Inf -0.025 1.0000
## 5 - 6      -0.1351 0.140 Inf -0.968 0.9608
## 5 - 7      0.1337 0.139 Inf 0.963 0.9619
## 6 - 7      0.2688 0.139 Inf 1.936 0.4565
##
```

```
## Results are averaged over the levels of: BreedGroup
## Results are given on the log (not the response) scale.
## P value adjustment: tukey method for comparing a family of 7 estimates
```

```
pairs(emmeans(EC_mod, ~BreedGroup))
```

```
## contrast estimate SE df z.ratio p.value
## Coop - Mixed      0.208 0.327 Inf 0.636 0.8004
## Coop - Noncoop    1.320 0.385 Inf 3.429 0.0018
## Mixed - Noncoop   1.112 0.368 Inf 3.026 0.0070
##
```

```
## Results are averaged over the levels of: Trial
## Results are given on the log (not the response) scale.
## P value adjustment: tukey method for comparing a family of 3 estimates
```

## h. 1-8. eye contact

```
EClec_data <- subset(EC_data, Trial==1 | Trial==2 | Trial==3 | Trial==4 | Trial==5 | Trial=
=6 | Trial==7 | Trial==8)
EClec_data$Trial <- factor(EClec_data$Trial, levels = c('1','2','3','4','5','6','7','8'))

EC_mod <- coxme(Surv(LEC, Event) ~ Trial + CI + BreedGroup + Age + (1|DogID), data = EClec_
data)
summary(EC_mod)
```

```

## Cox mixed-effects model fit by maximum likelihood
## Data: EClec_data
## events, n = 945, 1000
## Iterations= 22 131
##           NULL Integrated Fitted
## Log-likelihood -5744      -5368  -5145
##
##           Chisq    df p    AIC    BIC
## Integrated loglik 752.5 12.0 0 728.5 670.3
## Penalized loglik 1197.4 122.5 0 952.3 357.9
##
## Model: Surv(LEC, Event) ~ Trial + CI + BreedGroup + Age + (1 | DogID)
## Fixed coefficients
##           coef exp(coef) se(coef)      z      p
## Trial2      -0.00539   0.9946 0.139147 -0.04 9.7e-01
## Trial3       0.18412   1.2022 0.136168  1.35 1.8e-01
## Trial4       0.40880   1.5050 0.136405  3.00 2.7e-03
## Trial5       0.57654   1.7799 0.138505  4.16 3.1e-05
## Trial6       0.67547   1.9649 0.137953  4.90 9.8e-07
## Trial7       0.40214   1.4950 0.139371  2.89 3.9e-03
## Trial8       0.57074   1.7696 0.138566  4.12 3.8e-05
## CI          0.05083   1.0521 0.022757  2.23 2.6e-02
## BreedGroupMixed -0.19092  0.8262 0.314304 -0.61 5.4e-01
## BreedGroupNoncoop -1.28610  0.2763 0.371892 -3.46 5.4e-04
## Age         -0.01846   0.9817 0.002896 -6.38 1.8e-10
##
## Random effects
## Group Variable Std Dev Variance
## DogID Intercept 1.334  1.781

```

```

pairs(emmeans(EC_mod, ~Trial))

```

```

## contrast estimate SE df z.ratio p.value
## 1 - 2      0.0054 0.139 Inf  0.039 1.0000
## 1 - 3     -0.1841 0.136 Inf -1.352 0.8786
## 1 - 4     -0.4088 0.136 Inf -2.997 0.0552
## 1 - 5     -0.5765 0.139 Inf -4.163 0.0008
## 1 - 6     -0.6755 0.138 Inf -4.896 <.0001
## 1 - 7     -0.4021 0.139 Inf -2.885 0.0755
## 1 - 8     -0.5707 0.139 Inf -4.119 0.0010
## 2 - 3     -0.1895 0.139 Inf -1.361 0.8750
## 2 - 4     -0.4142 0.139 Inf -2.971 0.0595
## 2 - 5     -0.5819 0.140 Inf -4.167 0.0008
## 2 - 6     -0.6809 0.141 Inf -4.827 <.0001
## 2 - 7     -0.4075 0.140 Inf -2.909 0.0708
## 2 - 8     -0.5761 0.142 Inf -4.045 0.0014
## 3 - 4     -0.2247 0.139 Inf -1.621 0.7378
## 3 - 5     -0.3924 0.139 Inf -2.831 0.0875
## 3 - 6     -0.4913 0.140 Inf -3.522 0.0102
## 3 - 7     -0.2180 0.140 Inf -1.560 0.7745
## 3 - 8     -0.3866 0.141 Inf -2.746 0.1092
## 4 - 5     -0.1677 0.138 Inf -1.214 0.9281
## 4 - 6     -0.2667 0.137 Inf -1.949 0.5166
## 4 - 7      0.0067 0.138 Inf  0.048 1.0000
## 4 - 8     -0.1619 0.140 Inf -1.158 0.9437
## 5 - 6     -0.0989 0.139 Inf -0.713 0.9966
## 5 - 7      0.1744 0.138 Inf  1.262 0.9128

```

```
## 5 - 8      0.0058 0.138 Inf  0.042  1.0000
## 6 - 7      0.2733 0.138 Inf  1.975  0.4988
## 6 - 8      0.1047 0.140 Inf  0.749  0.9955
## 7 - 8     -0.1686 0.141 Inf -1.195  0.9337
##
## Results are averaged over the levels of: BreedGroup
## Results are given on the log (not the response) scale.
## P value adjustment: tukey method for comparing a family of 8 estimates
```

```
pairs(emmeans(EC_mod, ~BreedGroup))
```

```
## contrast      estimate      SE df z.ratio p.value
## Coop - Mixed      0.191 0.314 Inf 0.607  0.8161
## Coop - Noncoop    1.286 0.372 Inf 3.458  0.0016
## Mixed - Noncoop    1.095 0.351 Inf 3.123  0.0051
```

```
##
## Results are averaged over the levels of: Trial
## Results are given on the log (not the response) scale.
## P value adjustment: tukey method for comparing a family of 3 estimates
```

## i. 1-9. eye contact

```
EClec_data <- subset(EC_data, Trial==1 | Trial==2 | Trial==3 | Trial==4 | Trial==5 | Trial=
=6 | Trial==7 | Trial==8 | Trial==9)
EClec_data$Trial <- factor(EClec_data$Trial, levels = c('1','2','3','4','5','6','7','8','9')
)
```

```
EC_mod <- coxme(Surv(LEC, Event) ~ Trial + CI + BreedGroup + Age + (1|DogID), data = EClec_
data)
summary(EC_mod)
```

```
## Cox mixed-effects model fit by maximum likelihood
## Data: EClec_data
## events, n = 1059, 1125
## Iterations= 11 70
##          NULL Integrated Fitted
## Log-likelihood -6570      -6150  -5925
##
##          Chisq    df p    AIC    BIC
## Integrated loglik  839.3  13.0 0  813.3 748.8
## Penalized loglik 1290.2 123.9 0 1042.4 427.2
##
## Model: Surv(LEC, Event) ~ Trial + CI + BreedGroup + Age + (1 | DogID)
## Fixed coefficients
##          coef exp(coef) se(coef)      z      p
## Trial2      0.009621    1.0097 0.138225  0.07 9.4e-01
## Trial3      0.193496    1.2135 0.135690  1.43 1.5e-01
## Trial4      0.400566    1.4927 0.135931  2.95 3.2e-03
## Trial5      0.589536    1.8032 0.137995  4.27 1.9e-05
## Trial6      0.665908    1.9463 0.137195  4.85 1.2e-06
## Trial7      0.426582    1.5320 0.138369  3.08 2.0e-03
## Trial8      0.612013    1.8441 0.137642  4.45 8.7e-06
## Trial9      0.610987    1.8422 0.140132  4.36 1.3e-05
## CI          0.051220    1.0526 0.022198  2.31 2.1e-02
## BreedGroupMixed -0.121918    0.8852 0.307611 -0.40 6.9e-01
## BreedGroupNoncoop -1.216281    0.2963 0.363931 -3.34 8.3e-04
## Age          -0.018497    0.9817 0.002727 -6.78 1.2e-11
```

```
##
## Random effects
## Group Variable Std Dev Variance
## DogID Intercept 1.295 1.678

pairs(emmeans(EC_mod, ~Trial))

## contrast estimate SE df z.ratio p.value
## 1 - 2 -0.0096 0.138 Inf -0.070 1.0000
## 1 - 3 -0.1935 0.136 Inf -1.426 0.8881
## 1 - 4 -0.4006 0.136 Inf -2.947 0.0780
## 1 - 5 -0.5895 0.138 Inf -4.272 0.0007
## 1 - 6 -0.6659 0.137 Inf -4.854 <.0001
## 1 - 7 -0.4266 0.138 Inf -3.083 0.0529
## 1 - 8 -0.6120 0.138 Inf -4.446 0.0003
## 1 - 9 -0.6110 0.140 Inf -4.360 0.0004
## 2 - 3 -0.1839 0.138 Inf -1.329 0.9229
## 2 - 4 -0.3909 0.138 Inf -2.828 0.1072
## 2 - 5 -0.5799 0.139 Inf -4.186 0.0009
## 2 - 6 -0.6563 0.140 Inf -4.693 0.0001
## 2 - 7 -0.4170 0.139 Inf -3.001 0.0671
## 2 - 8 -0.6024 0.141 Inf -4.274 0.0006
## 2 - 9 -0.6014 0.142 Inf -4.240 0.0008
## 3 - 4 -0.2071 0.138 Inf -1.504 0.8541
## 3 - 5 -0.3960 0.138 Inf -2.871 0.0958
## 3 - 6 -0.4724 0.138 Inf -3.411 0.0187
## 3 - 7 -0.2331 0.139 Inf -1.681 0.7587
## 3 - 8 -0.4185 0.139 Inf -3.006 0.0661
## 3 - 9 -0.4175 0.140 Inf -2.972 0.0727
## 4 - 5 -0.1890 0.137 Inf -1.375 0.9075
## 4 - 6 -0.2653 0.136 Inf -1.946 0.5813
## 4 - 7 -0.0260 0.137 Inf -0.190 1.0000
## 4 - 8 -0.2114 0.139 Inf -1.525 0.8443
## 4 - 9 -0.2104 0.140 Inf -1.503 0.8546
## 5 - 6 -0.0764 0.138 Inf -0.553 0.9998
## 5 - 7 0.1630 0.137 Inf 1.188 0.9592
## 5 - 8 -0.0225 0.137 Inf -0.164 1.0000
## 5 - 9 -0.0215 0.139 Inf -0.154 1.0000
## 6 - 7 0.2393 0.137 Inf 1.744 0.7191
## 6 - 8 0.0539 0.138 Inf 0.389 1.0000
## 6 - 9 0.0549 0.140 Inf 0.393 1.0000
## 7 - 8 -0.1854 0.139 Inf -1.333 0.9217
## 7 - 9 -0.1844 0.139 Inf -1.326 0.9240
## 8 - 9 0.0010 0.139 Inf 0.007 1.0000
##
## Results are averaged over the levels of: BreedGroup
## Results are given on the log (not the response) scale.
## P value adjustment: tukey method for comparing a family of 9 estimates
```

```
pairs(emmeans(EC_mod, ~BreedGroup))

## contrast estimate SE df z.ratio p.value
## Coop - Mixed 0.122 0.308 Inf 0.396 0.9171
## Coop - Noncoop 1.216 0.364 Inf 3.342 0.0024
## Mixed - Noncoop 1.094 0.340 Inf 3.223 0.0036
##
## Results are averaged over the levels of: Trial
```

```
## Results are given on the log (not the response) scale.  
## P value adjustment: tukey method for comparing a family of 3 estimates
```

## j. 1-10. eye contact

```
EClec_data <- subset(EC_data, Trial==1 | Trial==2 | Trial==3 | Trial==4 | Trial==5 | Trial=  
=6 | Trial==7 | Trial==8 | Trial==9 | Trial==10)  
EClec_data$Trial <- factor(EClec_data$Trial, levels = c('1', '2', '3', '4', '5', '6', '7', '8', '9',  
'10'))
```

```
EC_mod <- coxme(Surv(LEC, Event) ~ Trial + CI + BreedGroup + Age + (1|DogID), data = EClec_  
data)  
summary(EC_mod)
```

```
## Cox mixed-effects model fit by maximum likelihood
```

```
## Data: EClec_data
```

```
## events, n = 1172, 1250
```

```
## Iterations= 18 107
```

```
## NULL Integrated Fitted
```

```
## Log-likelihood -7403 -6923 -6691
```

```
##
```

```
## Chisq df p AIC BIC
```

```
## Integrated loglik 959.7 14.0 0 931.7 860.8
```

```
## Penalized loglik 1424.8 125.2 0 1174.4 539.8
```

```
##
```

```
## Model: Surv(LEC, Event) ~ Trial + CI + BreedGroup + Age + (1 | DogID)
```

```
## Fixed coefficients
```

|                      | coef     | exp(coef) | se(coef) | z     | p       |
|----------------------|----------|-----------|----------|-------|---------|
| ## Trial2            | 0.01177  | 1.0118    | 0.137997 | 0.09  | 9.3e-01 |
| ## Trial3            | 0.18950  | 1.2086    | 0.135636 | 1.40  | 1.6e-01 |
| ## Trial4            | 0.42413  | 1.5283    | 0.135467 | 3.13  | 1.7e-03 |
| ## Trial5            | 0.59310  | 1.8096    | 0.137765 | 4.31  | 1.7e-05 |
| ## Trial6            | 0.67662  | 1.9672    | 0.137082 | 4.94  | 8.0e-07 |
| ## Trial7            | 0.46253  | 1.5881    | 0.137909 | 3.35  | 8.0e-04 |
| ## Trial8            | 0.63416  | 1.8854    | 0.137382 | 4.62  | 3.9e-06 |
| ## Trial9            | 0.65742  | 1.9298    | 0.139688 | 4.71  | 2.5e-06 |
| ## Trial10           | 0.54698  | 1.7280    | 0.138857 | 3.94  | 8.2e-05 |
| ## CI                | 0.05225  | 1.0536    | 0.022032 | 2.37  | 1.8e-02 |
| ## BreedGroupMixed   | -0.10230 | 0.9028    | 0.305645 | -0.33 | 7.4e-01 |
| ## BreedGroupNoncoop | -1.16596 | 0.3116    | 0.357865 | -3.26 | 1.1e-03 |
| ## Age               | -0.01802 | 0.9821    | 0.002651 | -6.80 | 1.1e-11 |

```
##
```

```
## Random effects
```

```
## Group Variable Std Dev Variance
```

```
## DogID Intercept 1.270 1.612
```

```
pairs(emmeans(EC_mod, ~Trial))
```

| ## contrast | estimate | SE    | df  | z.ratio | p.value |
|-------------|----------|-------|-----|---------|---------|
| ## 1 - 2    | -0.0118  | 0.138 | Inf | -0.085  | 1.0000  |
| ## 1 - 3    | -0.1895  | 0.136 | Inf | -1.397  | 0.9285  |
| ## 1 - 4    | -0.4241  | 0.135 | Inf | -3.131  | 0.0552  |
| ## 1 - 5    | -0.5931  | 0.138 | Inf | -4.305  | 0.0007  |
| ## 1 - 6    | -0.6766  | 0.137 | Inf | -4.936  | <.0001  |
| ## 1 - 7    | -0.4625  | 0.138 | Inf | -3.354  | 0.0275  |
| ## 1 - 8    | -0.6342  | 0.137 | Inf | -4.616  | 0.0002  |
| ## 1 - 9    | -0.6574  | 0.140 | Inf | -4.706  | 0.0001  |

```

## 1 - 10    -0.5470 0.139 Inf -3.939 0.0033
## 2 - 3     -0.1777 0.138 Inf -1.289 0.9564
## 2 - 4     -0.4124 0.138 Inf -2.999 0.0806
## 2 - 5     -0.5813 0.138 Inf -4.212 0.0011
## 2 - 6     -0.6649 0.139 Inf -4.767 0.0001
## 2 - 7     -0.4508 0.138 Inf -3.263 0.0368
## 2 - 8     -0.6224 0.140 Inf -4.434 0.0004
## 2 - 9     -0.6457 0.141 Inf -4.578 0.0002
## 2 - 10    -0.5352 0.140 Inf -3.810 0.0054
## 3 - 4     -0.2346 0.137 Inf -1.714 0.7878
## 3 - 5     -0.4036 0.138 Inf -2.932 0.0967
## 3 - 6     -0.4871 0.138 Inf -3.524 0.0155
## 3 - 7     -0.2730 0.138 Inf -1.977 0.6151
## 3 - 8     -0.4447 0.139 Inf -3.205 0.0440
## 3 - 9     -0.4679 0.140 Inf -3.345 0.0283
## 3 - 10    -0.3575 0.140 Inf -2.559 0.2376
## 4 - 5     -0.1690 0.137 Inf -1.237 0.9665
## 4 - 6     -0.2525 0.136 Inf -1.860 0.6963
## 4 - 7     -0.0384 0.136 Inf -0.282 1.0000
## 4 - 8     -0.2100 0.138 Inf -1.526 0.8820
## 4 - 9     -0.2333 0.139 Inf -1.682 0.8059
## 4 - 10    -0.1228 0.137 Inf -0.897 0.9966
## 5 - 6     -0.0835 0.138 Inf -0.606 0.9999
## 5 - 7      0.1306 0.137 Inf  0.956 0.9945
## 5 - 8     -0.0411 0.137 Inf -0.300 1.0000
## 5 - 9     -0.0643 0.138 Inf -0.464 1.0000
## 5 - 10    0.0461 0.139 Inf  0.333 1.0000
## 6 - 7      0.2141 0.137 Inf  1.564 0.8657
## 6 - 8      0.0425 0.138 Inf  0.308 1.0000
## 6 - 9      0.0192 0.139 Inf  0.138 1.0000
## 6 - 10    0.1296 0.138 Inf  0.937 0.9953
## 7 - 8     -0.1716 0.138 Inf -1.242 0.9656
## 7 - 9     -0.1949 0.138 Inf -1.409 0.9249
## 7 - 10    -0.0845 0.137 Inf -0.618 0.9998
## 8 - 9     -0.0233 0.138 Inf -0.168 1.0000
## 8 - 10    0.0872 0.139 Inf  0.629 0.9998
## 9 - 10    0.1104 0.138 Inf  0.801 0.9986
##
## Results are averaged over the levels of: BreedGroup
## Results are given on the log (not the response) scale.
## P value adjustment: tukey method for comparing a family of 10 estimates

```

```

pairs(emmeans(EC_mod, ~BreedGroup))

```

```

## contrast      estimate    SE df z.ratio p.value
## Coop - Mixed      0.102 0.306 Inf  0.335  0.9401
## Coop - Noncoop    1.166 0.358 Inf  3.258  0.0032
## Mixed - Noncoop    1.064 0.336 Inf  3.169  0.0044
##

```

```

## Results are averaged over the levels of: Trial
## Results are given on the log (not the response) scale.
## P value adjustment: tukey method for comparing a family of 3 estimates

```

## k. 1-11. eye contact

```

EClec_data <- subset(EC_data, Trial==1 | Trial==2 | Trial==3 | Trial==4 | Trial==5 | Trial==6 | Trial==7 | Trial==8 | Trial==9 | Trial==10 | Trial==11)

```



```

EClec_data$Trial <- factor(EClec_data$Trial,levels = c('1','2','3','4','5','6','7','8','9',
'10','11'))

EC_mod <- coxme(Surv(LEC, Event) ~ Trial + CI + BreedGroup + Age + (1|DogID), data = EClec_
data)
summary(EC_mod)

## Cox mixed-effects model fit by maximum likelihood
## Data: EClec_data
## events, n = 1283, 1375
## Iterations= 31 173
##          NULL Integrated Fitted
## Log-likelihood -8238          -7697  -7458
##
##          Chisq    df p  AIC   BIC
## Integrated loglik 1083 15.0 0 1053 976.0
## Penalized loglik 1560 126.6 0 1307 654.3
##
## Model: Surv(LEC, Event) ~ Trial + CI + BreedGroup + Age + (1 | DogID)
## Fixed coefficients
##          coef exp(coef) se(coef)      z      p
## Trial2      0.01915    1.0193 0.137502  0.14 8.9e-01
## Trial3      0.19278    1.2126 0.135272  1.43 1.5e-01
## Trial4      0.41213    1.5100 0.135162  3.05 2.3e-03
## Trial5      0.60895    1.8385 0.137271  4.44 9.2e-06
## Trial6      0.66246    1.9396 0.136691  4.85 1.3e-06
## Trial7      0.47108    1.6017 0.137409  3.43 6.1e-04
## Trial8      0.63619    1.8893 0.136870  4.65 3.3e-06
## Trial9      0.67263    1.9594 0.139136  4.83 1.3e-06
## Trial10     0.56707    1.7631 0.138445  4.10 4.2e-05
## Trial11     0.63375    1.8847 0.139023  4.56 5.1e-06
## CI         0.05349    1.0549 0.021842  2.45 1.4e-02
## BreedGroupMixed -0.09161    0.9125 0.300475 -0.30 7.6e-01
## BreedGroupNoncoop -1.16761    0.3111 0.350524 -3.33 8.7e-04
## Age        -0.01781    0.9823 0.002573 -6.92 4.5e-12
##
## Random effects
## Group Variable Std Dev Variance
## DogID Intercept 1.247 1.554

pairs(emmeans(EC_mod, ~Trial))

## contrast estimate SE df z.ratio p.value
## 1 - 2 -0.0192 0.138 Inf -0.139 1.0000
## 1 - 3 -0.1928 0.135 Inf -1.425 0.9424
## 1 - 4 -0.4121 0.135 Inf -3.049 0.0821
## 1 - 5 -0.6089 0.137 Inf -4.436 0.0005
## 1 - 6 -0.6625 0.137 Inf -4.846 0.0001
## 1 - 7 -0.4711 0.137 Inf -3.428 0.0256
## 1 - 8 -0.6362 0.137 Inf -4.648 0.0002
## 1 - 9 -0.6726 0.139 Inf -4.834 0.0001
## 1 - 10 -0.5671 0.138 Inf -4.096 0.0021
## 1 - 11 -0.6338 0.139 Inf -4.559 0.0003
## 2 - 3 -0.1736 0.137 Inf -1.264 0.9747
## 2 - 4 -0.3930 0.137 Inf -2.872 0.1319
## 2 - 5 -0.5898 0.138 Inf -4.289 0.0009
## 2 - 6 -0.6433 0.139 Inf -4.637 0.0002

```

```

## 2 - 7      -0.4519 0.137 Inf -3.288 0.0403
## 2 - 8      -0.6170 0.140 Inf -4.414 0.0005
## 2 - 9      -0.6535 0.140 Inf -4.657 0.0002
## 2 - 10     -0.5479 0.140 Inf -3.919 0.0043
## 2 - 11     -0.6146 0.141 Inf -4.371 0.0006
## 3 - 4      -0.2194 0.136 Inf -1.609 0.8789
## 3 - 5      -0.4162 0.137 Inf -3.035 0.0855
## 3 - 6      -0.4697 0.138 Inf -3.414 0.0269
## 3 - 7      -0.2783 0.137 Inf -2.025 0.6316
## 3 - 8      -0.4434 0.138 Inf -3.211 0.0511
## 3 - 9      -0.4799 0.139 Inf -3.445 0.0242
## 3 - 10     -0.3743 0.139 Inf -2.691 0.2038
## 3 - 11     -0.4410 0.140 Inf -3.160 0.0596
## 4 - 5      -0.1968 0.136 Inf -1.448 0.9362
## 4 - 6      -0.2503 0.135 Inf -1.848 0.7511
## 4 - 7      -0.0589 0.136 Inf -0.434 1.0000
## 4 - 8      -0.2241 0.137 Inf -1.633 0.8682
## 4 - 9      -0.2605 0.138 Inf -1.886 0.7268
## 4 - 10     -0.1549 0.136 Inf -1.136 0.9886
## 4 - 11     -0.2216 0.139 Inf -1.594 0.8852
## 5 - 6      -0.0535 0.137 Inf -0.390 1.0000
## 5 - 7       0.1379 0.136 Inf  1.014 0.9953
## 5 - 8      -0.0272 0.136 Inf -0.200 1.0000
## 5 - 9      -0.0637 0.138 Inf -0.462 1.0000
## 5 - 10     0.0419 0.138 Inf  0.303 1.0000
## 5 - 11     -0.0248 0.138 Inf -0.180 1.0000
## 6 - 7       0.1914 0.137 Inf  1.401 0.9485
## 6 - 8       0.0263 0.138 Inf  0.191 1.0000
## 6 - 9      -0.0102 0.139 Inf -0.073 1.0000
## 6 - 10     0.0954 0.138 Inf  0.692 0.9998
## 6 - 11     0.0287 0.140 Inf  0.205 1.0000
## 7 - 8      -0.1651 0.138 Inf -1.200 0.9827
## 7 - 9      -0.2016 0.138 Inf -1.463 0.9317
## 7 - 10     -0.0960 0.136 Inf -0.704 0.9998
## 7 - 11     -0.1627 0.138 Inf -1.176 0.9851
## 8 - 9      -0.0364 0.138 Inf -0.264 1.0000
## 8 - 10     0.0691 0.138 Inf  0.500 1.0000
## 8 - 11     0.0024 0.139 Inf  0.018 1.0000
## 9 - 10     0.1056 0.138 Inf  0.767 0.9996
## 9 - 11     0.0389 0.139 Inf  0.279 1.0000
## 10 - 11    -0.0667 0.139 Inf -0.480 1.0000
##
## Results are averaged over the levels of: BreedGroup
## Results are given on the log (not the response) scale.
## P value adjustment: tukey method for comparing a family of 11 estimates

pairs(emmeans(EC_mod, ~BreedGroup))

## contrast      estimate    SE  df z.ratio p.value
## Coop - Mixed    0.0916 0.300 Inf  0.305  0.9501
## Coop - Noncoop  1.1676 0.350 Inf  3.331  0.0025
## Mixed - Noncoop  1.0760 0.327 Inf  3.293  0.0029
##
## Results are averaged over the levels of: Trial
## Results are given on the log (not the response) scale.
## P value adjustment: tukey method for comparing a family of 3 estimates

```

## 1. 1-12. eye contact

```
EClec_data <- subset(EC_data, Trial==1 | Trial==2 | Trial==3 | Trial==4 | Trial==5 | Trial=
=6 | Trial==7 | Trial==8 | Trial==9 | Trial==10 | Trial==11 | Trial==12)
EClec_data$Trial <- factor(EClec_data$Trial,levels = c('1','2','3','4','5','6','7','8','9',
'10','11','12'))

EC_mod <- coxme(Surv(LEC, Event) ~ Trial + CI + BreedGroup + Age + Play + (1|DogID), data =
EClec_data)
summary(EC_mod)

## Cox mixed-effects model fit by maximum likelihood
## Data: EClec_data
## events, n = 1394, 1500
## Iterations= 21 122
## NULL Integrated Fitted
## Log-likelihood -9083 -8471 -8229
##
## Chisq df p AIC BIC
## Integrated loglik 1223 17.0 0 1189 1100.4
## Penalized loglik 1707 126.5 0 1454 791.8
##
## Model: Surv(LEC, Event) ~ Trial + CI + BreedGroup + Age + Play + (1 | DogID)
## Fixed coefficients
## coef exp(coef) se(coef) z p
## Trial2 0.01471 1.0148 0.136660 0.11 9.1e-01
## Trial3 0.18125 1.1987 0.134909 1.34 1.8e-01
## Trial4 0.40718 1.5026 0.134495 3.03 2.5e-03
## Trial5 0.60220 1.8261 0.136653 4.41 1.0e-05
## Trial6 0.64282 1.9018 0.136004 4.73 2.3e-06
## Trial7 0.46744 1.5959 0.136688 3.42 6.3e-04
## Trial8 0.64183 1.8999 0.136301 4.71 2.5e-06
## Trial9 0.68133 1.9765 0.138561 4.92 8.8e-07
## Trial10 0.58346 1.7922 0.137827 4.23 2.3e-05
## Trial11 0.65331 1.9219 0.138169 4.73 2.3e-06
## Trial12 0.70416 2.0221 0.137889 5.11 3.3e-07
## CI 0.05306 1.0545 0.019310 2.75 6.0e-03
## BreedGroupMixed -0.02110 0.9791 0.266151 -0.08 9.4e-01
## BreedGroupNoncoop -1.10280 0.3319 0.314956 -3.50 4.6e-04
## Age -0.01530 0.9848 0.002812 -5.44 5.3e-08
## Play1 0.49251 1.6364 0.241195 2.04 4.1e-02
##
## Random effects
## Group Variable Std Dev Variance
## DogID Intercept 1.114 1.242

pairs(emmeans(EC_mod, ~Trial))

## contrast estimate SE df z.ratio p.value
## 1 - 2 -0.0147 0.137 Inf -0.108 1.0000
## 1 - 3 -0.1812 0.135 Inf -1.343 0.9734
## 1 - 4 -0.4072 0.134 Inf -3.027 0.1006
## 1 - 5 -0.6022 0.137 Inf -4.407 0.0006
## 1 - 6 -0.6428 0.136 Inf -4.726 0.0001
## 1 - 7 -0.4674 0.137 Inf -3.420 0.0308
## 1 - 8 -0.6418 0.136 Inf -4.709 0.0002
## 1 - 9 -0.6813 0.139 Inf -4.917 0.0001
```

|    |         |         |       |     |        |        |
|----|---------|---------|-------|-----|--------|--------|
| ## | 1 - 10  | -0.5835 | 0.138 | Inf | -4.233 | 0.0014 |
| ## | 1 - 11  | -0.6533 | 0.138 | Inf | -4.728 | 0.0001 |
| ## | 1 - 12  | -0.7042 | 0.138 | Inf | -5.107 | <.0001 |
| ## | 2 - 3   | -0.1665 | 0.137 | Inf | -1.219 | 0.9876 |
| ## | 2 - 4   | -0.3925 | 0.136 | Inf | -2.885 | 0.1462 |
| ## | 2 - 5   | -0.5875 | 0.137 | Inf | -4.296 | 0.0011 |
| ## | 2 - 6   | -0.6281 | 0.138 | Inf | -4.550 | 0.0003 |
| ## | 2 - 7   | -0.4527 | 0.137 | Inf | -3.310 | 0.0438 |
| ## | 2 - 8   | -0.6271 | 0.139 | Inf | -4.514 | 0.0004 |
| ## | 2 - 9   | -0.6666 | 0.140 | Inf | -4.774 | 0.0001 |
| ## | 2 - 10  | -0.5687 | 0.139 | Inf | -4.092 | 0.0025 |
| ## | 2 - 11  | -0.6386 | 0.140 | Inf | -4.567 | 0.0003 |
| ## | 2 - 12  | -0.6895 | 0.140 | Inf | -4.930 | 0.0001 |
| ## | 3 - 4   | -0.2259 | 0.136 | Inf | -1.666 | 0.8836 |
| ## | 3 - 5   | -0.4210 | 0.137 | Inf | -3.080 | 0.0871 |
| ## | 3 - 6   | -0.4616 | 0.137 | Inf | -3.369 | 0.0364 |
| ## | 3 - 7   | -0.2862 | 0.137 | Inf | -2.091 | 0.6292 |
| ## | 3 - 8   | -0.4606 | 0.137 | Inf | -3.353 | 0.0383 |
| ## | 3 - 9   | -0.5001 | 0.139 | Inf | -3.603 | 0.0165 |
| ## | 3 - 10  | -0.4022 | 0.139 | Inf | -2.903 | 0.1397 |
| ## | 3 - 11  | -0.4721 | 0.139 | Inf | -3.401 | 0.0327 |
| ## | 3 - 12  | -0.5229 | 0.139 | Inf | -3.761 | 0.0093 |
| ## | 4 - 5   | -0.1950 | 0.135 | Inf | -1.441 | 0.9555 |
| ## | 4 - 6   | -0.2356 | 0.135 | Inf | -1.745 | 0.8471 |
| ## | 4 - 7   | -0.0603 | 0.135 | Inf | -0.445 | 1.0000 |
| ## | 4 - 8   | -0.2346 | 0.136 | Inf | -1.719 | 0.8598 |
| ## | 4 - 9   | -0.2742 | 0.138 | Inf | -1.992 | 0.6993 |
| ## | 4 - 10  | -0.1763 | 0.136 | Inf | -1.296 | 0.9798 |
| ## | 4 - 11  | -0.2461 | 0.138 | Inf | -1.782 | 0.8284 |
| ## | 4 - 12  | -0.2970 | 0.137 | Inf | -2.166 | 0.5746 |
| ## | 5 - 6   | -0.0406 | 0.137 | Inf | -0.297 | 1.0000 |
| ## | 5 - 7   | 0.1348  | 0.136 | Inf | 0.995  | 0.9978 |
| ## | 5 - 8   | -0.0396 | 0.136 | Inf | -0.291 | 1.0000 |
| ## | 5 - 9   | -0.0791 | 0.138 | Inf | -0.575 | 1.0000 |
| ## | 5 - 10  | 0.0187  | 0.137 | Inf | 0.136  | 1.0000 |
| ## | 5 - 11  | -0.0511 | 0.138 | Inf | -0.371 | 1.0000 |
| ## | 5 - 12  | -0.1020 | 0.138 | Inf | -0.741 | 0.9999 |
| ## | 6 - 7   | 0.1754  | 0.136 | Inf | 1.287  | 0.9808 |
| ## | 6 - 8   | 0.0010  | 0.137 | Inf | 0.007  | 1.0000 |
| ## | 6 - 9   | -0.0385 | 0.138 | Inf | -0.278 | 1.0000 |
| ## | 6 - 10  | 0.0594  | 0.138 | Inf | 0.432  | 1.0000 |
| ## | 6 - 11  | -0.0105 | 0.139 | Inf | -0.075 | 1.0000 |
| ## | 6 - 12  | -0.0613 | 0.139 | Inf | -0.442 | 1.0000 |
| ## | 7 - 8   | -0.1744 | 0.137 | Inf | -1.273 | 0.9825 |
| ## | 7 - 9   | -0.2139 | 0.137 | Inf | -1.558 | 0.9240 |
| ## | 7 - 10  | -0.1160 | 0.136 | Inf | -0.854 | 0.9995 |
| ## | 7 - 11  | -0.1859 | 0.138 | Inf | -1.352 | 0.9722 |
| ## | 7 - 12  | -0.2367 | 0.137 | Inf | -1.724 | 0.8576 |
| ## | 8 - 9   | -0.0395 | 0.137 | Inf | -0.287 | 1.0000 |
| ## | 8 - 10  | 0.0584  | 0.138 | Inf | 0.424  | 1.0000 |
| ## | 8 - 11  | -0.0115 | 0.139 | Inf | -0.083 | 1.0000 |
| ## | 8 - 12  | -0.0623 | 0.137 | Inf | -0.453 | 1.0000 |
| ## | 9 - 10  | 0.0979  | 0.137 | Inf | 0.712  | 0.9999 |
| ## | 9 - 11  | 0.0280  | 0.139 | Inf | 0.202  | 1.0000 |
| ## | 9 - 12  | -0.0228 | 0.138 | Inf | -0.165 | 1.0000 |
| ## | 10 - 11 | -0.0699 | 0.138 | Inf | -0.505 | 1.0000 |
| ## | 10 - 12 | -0.1207 | 0.137 | Inf | -0.879 | 0.9993 |

```
## 11 - 12 -0.0508 0.138 Inf -0.368 1.0000
##
## Results are averaged over the levels of: BreedGroup, Play
## Results are given on the log (not the response) scale.
## P value adjustment: tukey method for comparing a family of 12 estimates
```

```
pairs(emmeans(EC_mod, ~BreedGroup))
```

```
## contrast estimate SE df z.ratio p.value
## Coop - Mixed 0.0211 0.266 Inf 0.079 0.9965
## Coop - Noncoop 1.1028 0.315 Inf 3.501 0.0013
## Mixed - Noncoop 1.0817 0.291 Inf 3.716 0.0006
##
```

```
## Results are averaged over the levels of: Trial, Play
## Results are given on the log (not the response) scale.
## P value adjustment: tukey method for comparing a family of 3 estimates
```

### m.1-13. eye contact

```
EClec_data <- subset(EC_data, Trial==1 | Trial==2 | Trial==3 | Trial==4 | Trial==5 | Trial=
=6 | Trial==7 | Trial==8 | Trial==9 | Trial==10 | Trial==11 | Trial==12 | Trial==13)
EClec_data$Trial <- factor(EClec_data$Trial, levels = c('1', '2', '3', '4', '5', '6', '7', '8', '9',
'10', '11', '12', '13'))
```

```
EC_mod <- coxme(Surv(LEC, Event) ~ Trial + CI + BreedGroup + Age + Play + (1|DogID), data =
EClec_data)
```

```
summary(EC_mod)
```

```
## Cox mixed-effects model fit by maximum likelihood
```

```
## Data: EClec_data
```

```
## events, n = 1504, 1625
```

```
## Iterations= 21 122
```

```
## NULL Integrated Fitted
```

```
## Log-likelihood -9931 -9262 -9014
```

```
##
```

```
## Chisq df p AIC BIC
```

```
## Integrated loglik 1338 18.0 0 1302 1206.2
```

```
## Penalized loglik 1833 127.5 0 1578 900.5
```

```
##
```

```
## Model: Surv(LEC, Event) ~ Trial + CI + BreedGroup + Age + Play + (1 | DogID)
```

```
## Fixed coefficients
```

```
## coef exp(coef) se(coef) z p
## Trial2 0.04678 1.0479 0.136182 0.34 7.3e-01
## Trial3 0.18982 1.2090 0.134475 1.41 1.6e-01
## Trial4 0.42100 1.5235 0.134228 3.14 1.7e-03
## Trial5 0.60780 1.8364 0.136310 4.46 8.2e-06
## Trial6 0.65342 1.9221 0.135705 4.81 1.5e-06
## Trial7 0.48815 1.6293 0.136256 3.58 3.4e-04
## Trial8 0.66010 1.9350 0.136013 4.85 1.2e-06
## Trial9 0.70078 2.0153 0.138256 5.07 4.0e-07
## Trial10 0.61151 1.8432 0.137444 4.45 8.6e-06
## Trial11 0.67668 1.9673 0.137806 4.91 9.1e-07
## Trial12 0.73653 2.0887 0.137540 5.36 8.6e-08
## Trial13 0.81392 2.2567 0.140011 5.81 6.1e-09
## CI 0.05191 1.0533 0.018687 2.78 5.5e-03
## BreedGroupMixed -0.03651 0.9641 0.256298 -0.14 8.9e-01
## BreedGroupNoncoop -1.10516 0.3312 0.303314 -3.64 2.7e-04
```

```
## Age          -0.01480    0.9853 0.002739 -5.40 6.5e-08
## Play1       0.48562     1.6252 0.232914  2.08 3.7e-02
##
## Random effects
## Group Variable Std Dev Variance
## DogID Intercept 1.076    1.159
```

```
pairs(emmeans(EC_mod, ~Trial))
```

```
## contrast estimate    SE  df z.ratio p.value
## 1 - 2      -0.0468 0.136 Inf  -0.344  1.0000
## 1 - 3      -0.1898 0.134 Inf  -1.412  0.9728
## 1 - 4      -0.4210 0.134 Inf  -3.136  0.0846
## 1 - 5      -0.6078 0.136 Inf  -4.459  0.0006
## 1 - 6      -0.6534 0.136 Inf  -4.815  0.0001
## 1 - 7      -0.4881 0.136 Inf  -3.583  0.0205
## 1 - 8      -0.6601 0.136 Inf  -4.853  0.0001
## 1 - 9      -0.7008 0.138 Inf  -5.069  <.0001
## 1 - 10     -0.6115 0.137 Inf  -4.449  0.0006
## 1 - 11     -0.6767 0.138 Inf  -4.910  0.0001
## 1 - 12     -0.7365 0.138 Inf  -5.355  <.0001
## 1 - 13     -0.8139 0.140 Inf  -5.813  <.0001
## 2 - 3      -0.1430 0.136 Inf  -1.054  0.9980
## 2 - 4      -0.3742 0.135 Inf  -2.763  0.2196
## 2 - 5      -0.5610 0.136 Inf  -4.123  0.0026
## 2 - 6      -0.6066 0.137 Inf  -4.419  0.0007
## 2 - 7      -0.4414 0.136 Inf  -3.241  0.0622
## 2 - 8      -0.6133 0.138 Inf  -4.440  0.0007
## 2 - 9      -0.6540 0.139 Inf  -4.701  0.0002
## 2 - 10     -0.5647 0.138 Inf  -4.089  0.0030
## 2 - 11     -0.6299 0.139 Inf  -4.528  0.0004
## 2 - 12     -0.6897 0.139 Inf  -4.956  0.0001
## 2 - 13     -0.7671 0.140 Inf  -5.492  <.0001
## 3 - 4      -0.2312 0.135 Inf  -1.714  0.8896
## 3 - 5      -0.4180 0.136 Inf  -3.074  0.1008
## 3 - 6      -0.4636 0.137 Inf  -3.395  0.0385
## 3 - 7      -0.2983 0.136 Inf  -2.192  0.5968
## 3 - 8      -0.4703 0.137 Inf  -3.440  0.0332
## 3 - 9      -0.5110 0.138 Inf  -3.699  0.0136
## 3 - 10     -0.4217 0.138 Inf  -3.061  0.1043
## 3 - 11     -0.4869 0.138 Inf  -3.529  0.0247
## 3 - 12     -0.5467 0.138 Inf  -3.954  0.0051
## 3 - 13     -0.6241 0.140 Inf  -4.465  0.0006
## 4 - 5      -0.1868 0.135 Inf  -1.385  0.9767
## 4 - 6      -0.2324 0.135 Inf  -1.726  0.8844
## 4 - 7      -0.0672 0.135 Inf  -0.498  1.0000
## 4 - 8      -0.2391 0.136 Inf  -1.759  0.8700
## 4 - 9      -0.2798 0.137 Inf  -2.039  0.7067
## 4 - 10     -0.1905 0.136 Inf  -1.404  0.9740
## 4 - 11     -0.2557 0.138 Inf  -1.859  0.8193
## 4 - 12     -0.3155 0.137 Inf  -2.310  0.5092
## 4 - 13     -0.3929 0.138 Inf  -2.845  0.1817
## 5 - 6      -0.0456 0.136 Inf  -0.334  1.0000
## 5 - 7       0.1197 0.135 Inf   0.886  0.9996
## 5 - 8      -0.0523 0.136 Inf  -0.386  1.0000
## 5 - 9      -0.0930 0.137 Inf  -0.678  1.0000
## 5 - 10     -0.0037 0.137 Inf  -0.027  1.0000
```

```

## 5 - 11    -0.0689 0.137 Inf -0.502 1.0000
## 5 - 12    -0.1287 0.137 Inf -0.938 0.9994
## 5 - 13    -0.2061 0.139 Inf -1.483 0.9601
## 6 - 7      0.1653 0.136 Inf  1.218 0.9922
## 6 - 8     -0.0067 0.137 Inf -0.049 1.0000
## 6 - 9     -0.0474 0.138 Inf -0.343 1.0000
## 6 - 10    0.0419 0.137 Inf  0.306 1.0000
## 6 - 11   -0.0233 0.138 Inf -0.168 1.0000
## 6 - 12   -0.0831 0.138 Inf -0.602 1.0000
## 6 - 13   -0.1605 0.139 Inf -1.156 0.9951
## 7 - 8     -0.1720 0.136 Inf -1.261 0.9894
## 7 - 9     -0.2126 0.137 Inf -1.553 0.9437
## 7 - 10    -0.1234 0.135 Inf -0.911 0.9995
## 7 - 11   -0.1885 0.137 Inf -1.377 0.9777
## 7 - 12   -0.2484 0.137 Inf -1.816 0.8423
## 7 - 13   -0.3258 0.138 Inf -2.361 0.4718
## 8 - 9     -0.0407 0.137 Inf -0.297 1.0000
## 8 - 10    0.0486 0.137 Inf  0.354 1.0000
## 8 - 11   -0.0166 0.138 Inf -0.120 1.0000
## 8 - 12   -0.0764 0.137 Inf -0.558 1.0000
## 8 - 13   -0.1538 0.139 Inf -1.109 0.9967
## 9 - 10    0.0893 0.137 Inf  0.651 1.0000
## 9 - 11    0.0241 0.138 Inf  0.174 1.0000
## 9 - 12   -0.0357 0.138 Inf -0.259 1.0000
## 9 - 13   -0.1131 0.139 Inf -0.811 0.9999
## 10 - 11   -0.0652 0.138 Inf -0.473 1.0000
## 10 - 12  -0.1250 0.137 Inf -0.913 0.9995
## 10 - 13  -0.2024 0.138 Inf -1.463 0.9641
## 11 - 12  -0.0598 0.138 Inf -0.433 1.0000
## 11 - 13  -0.1372 0.140 Inf -0.981 0.9990
## 12 - 13  -0.0774 0.139 Inf -0.558 1.0000
##
## Results are averaged over the levels of: BreedGroup, Play
## Results are given on the log (not the response) scale.
## P value adjustment: tukey method for comparing a family of 13 estimates

```

```

pairs(emmeans(EC_mod, ~BreedGroup))

```

```

## contrast      estimate    SE  df z.ratio p.value
## Coop - Mixed    0.0365 0.256 Inf  0.142  0.9889
## Coop - Noncoop  1.1052 0.303 Inf  3.644  0.0008
## Mixed - Noncoop  1.0687 0.279 Inf  3.830  0.0004
##

```

```

## Results are averaged over the levels of: Trial, Play
## Results are given on the log (not the response) scale.
## P value adjustment: tukey method for comparing a family of 3 estimates

```

## n. 1-14. eye contact

```

EClec_data <- subset(EC_data, Trial==1 | Trial==2 | Trial==3 | Trial==4 | Trial==5 | Trial=
=6 | Trial==7 | Trial==8 | Trial==9 | Trial==10 | Trial==11 | Trial==12 | Trial==13 | Trial
==14)
EClec_data$Trial <- factor(EClec_data$Trial, levels = c('1', '2', '3', '4', '5', '6', '7', '8', '9',
'10', '11', '12', '13', '14'))
EC_mod <- coxme(Surv(LEC, Event) ~ Trial + CI + BreedGroup + Age + Play + (1|DogID), data =

```

```
EClec_data)
```

```
summary(EC_mod)
```

```
## Cox mixed-effects model fit by maximum likelihood
```

```
## Data: EClec_data
```

```
## events, n = 1613, 1750
```

```
## Iterations= 32 178
```

```
## NULL Integrated Fitted
```

```
## Log-likelihood -10782 -10053 -9800
```

```
##
```

```
## Chisq df p AIC BIC
```

```
## Integrated loglik 1458 19.0 0 1420 1318
```

```
## Penalized loglik 1964 129.1 0 1706 1010
```

```
##
```

```
## Model: Surv(LEC, Event) ~ Trial + CI + BreedGroup + Age + Play + (1 | DogID)
```

```
## Fixed coefficients
```

```
## coef exp(coef) se(coef) z p
```

```
## Trial2 0.04834 1.0495 0.135584 0.36 7.2e-01
```

```
## Trial3 0.17542 1.1917 0.134018 1.31 1.9e-01
```

```
## Trial4 0.42409 1.5282 0.133783 3.17 1.5e-03
```

```
## Trial5 0.61352 1.8469 0.135822 4.52 6.3e-06
```

```
## Trial6 0.64984 1.9152 0.135153 4.81 1.5e-06
```

```
## Trial7 0.48160 1.6187 0.135746 3.55 3.9e-04
```

```
## Trial8 0.65581 1.9267 0.135390 4.84 1.3e-06
```

```
## Trial9 0.70298 2.0198 0.137676 5.11 3.3e-07
```

```
## Trial10 0.61822 1.8556 0.136907 4.52 6.3e-06
```

```
## Trial11 0.68609 1.9859 0.137467 4.99 6.0e-07
```

```
## Trial12 0.76302 2.1447 0.136944 5.57 2.5e-08
```

```
## Trial13 0.83372 2.3019 0.139447 5.98 2.2e-09
```

```
## Trial14 0.55735 1.7460 0.137795 4.04 5.2e-05
```

```
## CI 0.05326 1.0547 0.019097 2.79 5.3e-03
```

```
## BreedGroupMixed -0.01351 0.9866 0.263195 -0.05 9.6e-01
```

```
## BreedGroupNoncoop -1.08905 0.3365 0.310994 -3.50 4.6e-04
```

```
## Age -0.01454 0.9856 0.002803 -5.19 2.1e-07
```

```
## Play1 0.50344 1.6544 0.236800 2.13 3.4e-02
```

```
##
```

```
## Random effects
```

```
## Group Variable Std Dev Variance
```

```
## DogID Intercept 1.094 1.197
```

```
pairs(emmeans(EC_mod, ~Trial))
```

```
## contrast estimate SE df z.ratio p.value
```

```
## 1 - 2 -0.0483 0.136 Inf -0.357 1.0000
```

```
## 1 - 3 -0.1754 0.134 Inf -1.309 0.9902
```

```
## 1 - 4 -0.4241 0.134 Inf -3.170 0.0868
```

```
## 1 - 5 -0.6135 0.136 Inf -4.517 0.0005
```

```
## 1 - 6 -0.6498 0.135 Inf -4.808 0.0001
```

```
## 1 - 7 -0.4816 0.136 Inf -3.548 0.0265
```

```
## 1 - 8 -0.6558 0.135 Inf -4.844 0.0001
```

```
## 1 - 9 -0.7030 0.138 Inf -5.106 <.0001
```

```
## 1 - 10 -0.6182 0.137 Inf -4.516 0.0005
```

```
## 1 - 11 -0.6861 0.137 Inf -4.991 0.0001
```

```
## 1 - 12 -0.7630 0.137 Inf -5.572 <.0001
```

```
## 1 - 13 -0.8337 0.139 Inf -5.979 <.0001
```

```
## 1 - 14 -0.5574 0.138 Inf -4.045 0.0041
```

```
## 2 - 3 -0.1271 0.135 Inf -0.938 0.9997
```



|    |        |         |       |     |        |        |
|----|--------|---------|-------|-----|--------|--------|
| ## | 2 - 4  | -0.3758 | 0.135 | Inf | -2.781 | 0.2341 |
| ## | 2 - 5  | -0.5652 | 0.136 | Inf | -4.165 | 0.0025 |
| ## | 2 - 6  | -0.6015 | 0.137 | Inf | -4.395 | 0.0009 |
| ## | 2 - 7  | -0.4333 | 0.136 | Inf | -3.191 | 0.0817 |
| ## | 2 - 8  | -0.6075 | 0.138 | Inf | -4.413 | 0.0009 |
| ## | 2 - 9  | -0.6546 | 0.139 | Inf | -4.721 | 0.0002 |
| ## | 2 - 10 | -0.5699 | 0.138 | Inf | -4.139 | 0.0028 |
| ## | 2 - 11 | -0.6378 | 0.139 | Inf | -4.595 | 0.0004 |
| ## | 2 - 12 | -0.7147 | 0.139 | Inf | -5.157 | <.0001 |
| ## | 2 - 13 | -0.7854 | 0.139 | Inf | -5.636 | <.0001 |
| ## | 2 - 14 | -0.5090 | 0.139 | Inf | -3.664 | 0.0176 |
| ## | 3 - 4  | -0.2487 | 0.135 | Inf | -1.846 | 0.8549 |
| ## | 3 - 5  | -0.4381 | 0.136 | Inf | -3.227 | 0.0736 |
| ## | 3 - 6  | -0.4744 | 0.136 | Inf | -3.480 | 0.0333 |
| ## | 3 - 7  | -0.3062 | 0.136 | Inf | -2.253 | 0.5902 |
| ## | 3 - 8  | -0.4804 | 0.136 | Inf | -3.521 | 0.0290 |
| ## | 3 - 9  | -0.5276 | 0.138 | Inf | -3.826 | 0.0097 |
| ## | 3 - 10 | -0.4428 | 0.138 | Inf | -3.220 | 0.0751 |
| ## | 3 - 11 | -0.5107 | 0.138 | Inf | -3.707 | 0.0151 |
| ## | 3 - 12 | -0.5876 | 0.138 | Inf | -4.260 | 0.0017 |
| ## | 3 - 13 | -0.6583 | 0.140 | Inf | -4.718 | 0.0002 |
| ## | 3 - 14 | -0.3819 | 0.139 | Inf | -2.742 | 0.2551 |
| ## | 4 - 5  | -0.1894 | 0.135 | Inf | -1.408 | 0.9813 |
| ## | 4 - 6  | -0.2258 | 0.135 | Inf | -1.677 | 0.9242 |
| ## | 4 - 7  | -0.0575 | 0.135 | Inf | -0.427 | 1.0000 |
| ## | 4 - 8  | -0.2317 | 0.136 | Inf | -1.708 | 0.9135 |
| ## | 4 - 9  | -0.2789 | 0.137 | Inf | -2.036 | 0.7453 |
| ## | 4 - 10 | -0.1941 | 0.135 | Inf | -1.433 | 0.9782 |
| ## | 4 - 11 | -0.2620 | 0.137 | Inf | -1.907 | 0.8231 |
| ## | 4 - 12 | -0.3389 | 0.136 | Inf | -2.487 | 0.4172 |
| ## | 4 - 13 | -0.4096 | 0.138 | Inf | -2.974 | 0.1476 |
| ## | 4 - 14 | -0.1333 | 0.137 | Inf | -0.972 | 0.9995 |
| ## | 5 - 6  | -0.0363 | 0.136 | Inf | -0.267 | 1.0000 |
| ## | 5 - 7  | 0.1319  | 0.135 | Inf | 0.978  | 0.9995 |
| ## | 5 - 8  | -0.0423 | 0.135 | Inf | -0.312 | 1.0000 |
| ## | 5 - 9  | -0.0895 | 0.137 | Inf | -0.654 | 1.0000 |
| ## | 5 - 10 | -0.0047 | 0.137 | Inf | -0.034 | 1.0000 |
| ## | 5 - 11 | -0.0726 | 0.137 | Inf | -0.529 | 1.0000 |
| ## | 5 - 12 | -0.1495 | 0.137 | Inf | -1.092 | 0.9983 |
| ## | 5 - 13 | -0.2202 | 0.139 | Inf | -1.588 | 0.9496 |
| ## | 5 - 14 | 0.0562  | 0.138 | Inf | 0.408  | 1.0000 |
| ## | 6 - 7  | 0.1682  | 0.136 | Inf | 1.241  | 0.9941 |
| ## | 6 - 8  | -0.0060 | 0.136 | Inf | -0.044 | 1.0000 |
| ## | 6 - 9  | -0.0531 | 0.138 | Inf | -0.385 | 1.0000 |
| ## | 6 - 10 | 0.0316  | 0.137 | Inf | 0.231  | 1.0000 |
| ## | 6 - 11 | -0.0363 | 0.138 | Inf | -0.262 | 1.0000 |
| ## | 6 - 12 | -0.1132 | 0.138 | Inf | -0.822 | 0.9999 |
| ## | 6 - 13 | -0.1839 | 0.139 | Inf | -1.327 | 0.9889 |
| ## | 6 - 14 | 0.0925  | 0.138 | Inf | 0.668  | 1.0000 |
| ## | 7 - 8  | -0.1742 | 0.136 | Inf | -1.280 | 0.9921 |
| ## | 7 - 9  | -0.2214 | 0.137 | Inf | -1.620 | 0.9412 |
| ## | 7 - 10 | -0.1366 | 0.135 | Inf | -1.010 | 0.9993 |
| ## | 7 - 11 | -0.2045 | 0.137 | Inf | -1.496 | 0.9687 |
| ## | 7 - 12 | -0.2814 | 0.136 | Inf | -2.062 | 0.7278 |
| ## | 7 - 13 | -0.3521 | 0.138 | Inf | -2.558 | 0.3680 |
| ## | 7 - 14 | -0.0758 | 0.138 | Inf | -0.548 | 1.0000 |
| ## | 8 - 9  | -0.0472 | 0.137 | Inf | -0.344 | 1.0000 |

```
## 8 - 10      0.0376 0.137 Inf  0.275  1.0000
## 8 - 11     -0.0303 0.138 Inf -0.219  1.0000
## 8 - 12     -0.1072 0.137 Inf -0.785  1.0000
## 8 - 13     -0.1779 0.138 Inf -1.285  0.9918
## 8 - 14      0.0985 0.139 Inf  0.711  1.0000
## 9 - 10      0.0848 0.137 Inf  0.619  1.0000
## 9 - 11      0.0169 0.138 Inf  0.122  1.0000
## 9 - 12     -0.0600 0.138 Inf -0.436  1.0000
## 9 - 13     -0.1307 0.139 Inf -0.939  0.9997
## 9 - 14      0.1456 0.139 Inf  1.046  0.9989
## 10 - 11    -0.0679 0.138 Inf -0.493  1.0000
## 10 - 12    -0.1448 0.137 Inf -1.059  0.9988
## 10 - 13    -0.2155 0.138 Inf -1.560  0.9561
## 10 - 14     0.0609 0.138 Inf  0.440  1.0000
## 11 - 12    -0.0769 0.138 Inf -0.557  1.0000
## 11 - 13    -0.1476 0.140 Inf -1.055  0.9988
## 11 - 14     0.1287 0.140 Inf  0.922  0.9997
## 12 - 13    -0.0707 0.139 Inf -0.510  1.0000
## 12 - 14     0.2057 0.138 Inf  1.492  0.9694
## 13 - 14     0.2764 0.140 Inf  1.978  0.7817
##
## Results are averaged over the levels of: BreedGroup, Play
## Results are given on the log (not the response) scale.
## P value adjustment: tukey method for comparing a family of 14 estimates
```

```
pairs(emmeans(EC_mod, ~BreedGroup))
```

```
## contrast      estimate      SE df z.ratio p.value
## Coop - Mixed      0.0135 0.263 Inf  0.051  0.9985
## Coop - Noncoop    1.0890 0.311 Inf  3.502  0.0013
## Mixed - Noncoop   1.0755 0.285 Inf  3.775  0.0005
```

```
##
## Results are averaged over the levels of: Trial, Play
## Results are given on the log (not the response) scale.
## P value adjustment: tukey method for comparing a family of 3 estimates
```

## o. 1-15. eye contact

```
EClec_data <- subset(EC_data, Trial==1 | Trial==2 | Trial==3 | Trial==4 | Trial==5 | Trial=
=6 | Trial==7 | Trial==8 | Trial==9 | Trial==10 | Trial==11 | Trial==12 | Trial==13 | Trial
==14 | Trial==15)
EClec_data$Trial <- factor(EClec_data$Trial, levels = c('1', '2', '3', '4', '5', '6', '7', '8', '9',
'10', '11', '12', '13', '14', '15'))

EC_mod <- coxme(Surv(LEC, Event) ~ Trial + CI + BreedGroup + Age + Play + (1|DogID), data =
EClec_data)
summary(EC_mod)

## Cox mixed-effects model fit by maximum likelihood
## Data: EClec_data
## events, n = 1722, 1875
## Iterations= 15 91
##
## NULL Integrated Fitted
## Log-likelihood -11640 -10852 -10594
##
## Chisq df p AIC BIC
## Integrated loglik 1576 20 0 1536 1427
```

```

## Penalized loglik 2093 130 0 1833 1124
##
## Model: Surv(LEC, Event) ~ Trial + CI + BreedGroup + Age + Play + (1 | DogID)
## Fixed coefficients
##          coef exp(coef) se(coef)      z      p
## Trial2      0.05155    1.0529 0.135161  0.38 7.0e-01
## Trial3      0.18101    1.1984 0.133714  1.35 1.8e-01
## Trial4      0.42467    1.5291 0.133549  3.18 1.5e-03
## Trial5      0.62033    1.8595 0.135456  4.58 4.7e-06
## Trial6      0.64176    1.8998 0.134994  4.75 2.0e-06
## Trial7      0.48484    1.6239 0.135408  3.58 3.4e-04
## Trial8      0.65621    1.9275 0.135072  4.86 1.2e-06
## Trial9      0.69865    2.0110 0.137392  5.09 3.7e-07
## Trial10     0.63043    1.8784 0.136596  4.62 3.9e-06
## Trial11     0.70013    2.0140 0.137207  5.10 3.3e-07
## Trial12     0.77089    2.1617 0.136591  5.64 1.7e-08
## Trial13     0.84302    2.3234 0.139037  6.06 1.3e-09
## Trial14     0.57369    1.7748 0.137465  4.17 3.0e-05
## Trial15     0.72470    2.0641 0.138162  5.25 1.6e-07
## CI         0.05381    1.0553 0.018295  2.94 3.3e-03
## BreedGroupMixed -0.01015    0.9899 0.251391 -0.04 9.7e-01
## BreedGroupNoncoop -1.08678    0.3373 0.298336 -3.64 2.7e-04
## Age        -0.01428    0.9858 0.002707 -5.27 1.3e-07
## Play1      0.51487    1.6734 0.226305  2.28 2.3e-02
##
## Random effects
## Group Variable Std Dev Variance
## DogID Intercept 1.051 1.106

```

```

pairs(emmeans(EC_mod, ~Trial))

```

```

## contrast estimate SE df z.ratio p.value
## 1 - 2      -0.0515 0.135 Inf -0.381 1.0000
## 1 - 3      -0.1810 0.134 Inf -1.354 0.9909
## 1 - 4      -0.4247 0.134 Inf -3.180 0.0943
## 1 - 5      -0.6203 0.135 Inf -4.580 0.0005
## 1 - 6      -0.6418 0.135 Inf -4.754 0.0002
## 1 - 7      -0.4848 0.135 Inf -3.581 0.0268
## 1 - 8      -0.6562 0.135 Inf -4.858 0.0001
## 1 - 9      -0.6987 0.137 Inf -5.085 <.0001
## 1 - 10     -0.6304 0.137 Inf -4.615 0.0004
## 1 - 11     -0.7001 0.137 Inf -5.103 <.0001
## 1 - 12     -0.7709 0.137 Inf -5.644 <.0001
## 1 - 13     -0.8430 0.139 Inf -6.063 <.0001
## 1 - 14     -0.5737 0.137 Inf -4.173 0.0028
## 1 - 15     -0.7247 0.138 Inf -5.245 <.0001
## 2 - 3      -0.1295 0.135 Inf -0.960 0.9998
## 2 - 4      -0.3731 0.135 Inf -2.769 0.2636
## 2 - 5      -0.5688 0.135 Inf -4.207 0.0024
## 2 - 6      -0.5902 0.136 Inf -4.325 0.0014
## 2 - 7      -0.4333 0.135 Inf -3.202 0.0887
## 2 - 8      -0.6047 0.137 Inf -4.407 0.0010
## 2 - 9      -0.6471 0.138 Inf -4.682 0.0003
## 2 - 10     -0.5789 0.137 Inf -4.220 0.0023
## 2 - 11     -0.6486 0.138 Inf -4.689 0.0003
## 2 - 12     -0.7193 0.138 Inf -5.211 <.0001
## 2 - 13     -0.7915 0.139 Inf -5.700 <.0001

```

|    |        |         |       |     |        |        |
|----|--------|---------|-------|-----|--------|--------|
| ## | 2 - 14 | -0.5221 | 0.138 | Inf | -3.772 | 0.0135 |
| ## | 2 - 15 | -0.6732 | 0.139 | Inf | -4.839 | 0.0001 |
| ## | 3 - 4  | -0.2437 | 0.134 | Inf | -1.815 | 0.8927 |
| ## | 3 - 5  | -0.4393 | 0.135 | Inf | -3.249 | 0.0773 |
| ## | 3 - 6  | -0.4608 | 0.136 | Inf | -3.390 | 0.0502 |
| ## | 3 - 7  | -0.3038 | 0.135 | Inf | -2.244 | 0.6324 |
| ## | 3 - 8  | -0.4752 | 0.136 | Inf | -3.494 | 0.0358 |
| ## | 3 - 9  | -0.5176 | 0.137 | Inf | -3.769 | 0.0137 |
| ## | 3 - 10 | -0.4494 | 0.137 | Inf | -3.283 | 0.0698 |
| ## | 3 - 11 | -0.5191 | 0.137 | Inf | -3.783 | 0.0130 |
| ## | 3 - 12 | -0.5899 | 0.137 | Inf | -4.293 | 0.0017 |
| ## | 3 - 13 | -0.6620 | 0.139 | Inf | -4.764 | 0.0002 |
| ## | 3 - 14 | -0.3927 | 0.139 | Inf | -2.831 | 0.2301 |
| ## | 3 - 15 | -0.5437 | 0.138 | Inf | -3.937 | 0.0072 |
| ## | 4 - 5  | -0.1957 | 0.134 | Inf | -1.456 | 0.9820 |
| ## | 4 - 6  | -0.2171 | 0.134 | Inf | -1.615 | 0.9557 |
| ## | 4 - 7  | -0.0602 | 0.134 | Inf | -0.448 | 1.0000 |
| ## | 4 - 8  | -0.2315 | 0.135 | Inf | -1.710 | 0.9305 |
| ## | 4 - 9  | -0.2740 | 0.137 | Inf | -2.003 | 0.7968 |
| ## | 4 - 10 | -0.2058 | 0.135 | Inf | -1.523 | 0.9732 |
| ## | 4 - 11 | -0.2755 | 0.137 | Inf | -2.010 | 0.7928 |
| ## | 4 - 12 | -0.3462 | 0.136 | Inf | -2.545 | 0.4076 |
| ## | 4 - 13 | -0.4184 | 0.137 | Inf | -3.046 | 0.1359 |
| ## | 4 - 14 | -0.1490 | 0.137 | Inf | -1.089 | 0.9991 |
| ## | 4 - 15 | -0.3000 | 0.137 | Inf | -2.186 | 0.6751 |
| ## | 5 - 6  | -0.0214 | 0.136 | Inf | -0.158 | 1.0000 |
| ## | 5 - 7  | 0.1355  | 0.134 | Inf | 1.007  | 0.9996 |
| ## | 5 - 8  | -0.0359 | 0.135 | Inf | -0.266 | 1.0000 |
| ## | 5 - 9  | -0.0783 | 0.136 | Inf | -0.574 | 1.0000 |
| ## | 5 - 10 | -0.0101 | 0.136 | Inf | -0.074 | 1.0000 |
| ## | 5 - 11 | -0.0798 | 0.137 | Inf | -0.584 | 1.0000 |
| ## | 5 - 12 | -0.1506 | 0.137 | Inf | -1.103 | 0.9989 |
| ## | 5 - 13 | -0.2227 | 0.138 | Inf | -1.611 | 0.9568 |
| ## | 5 - 14 | 0.0466  | 0.137 | Inf | 0.340  | 1.0000 |
| ## | 5 - 15 | -0.1044 | 0.137 | Inf | -0.760 | 1.0000 |
| ## | 6 - 7  | 0.1569  | 0.135 | Inf | 1.160  | 0.9981 |
| ## | 6 - 8  | -0.0144 | 0.136 | Inf | -0.106 | 1.0000 |
| ## | 6 - 9  | -0.0569 | 0.138 | Inf | -0.413 | 1.0000 |
| ## | 6 - 10 | 0.0113  | 0.136 | Inf | 0.083  | 1.0000 |
| ## | 6 - 11 | -0.0584 | 0.138 | Inf | -0.423 | 1.0000 |
| ## | 6 - 12 | -0.1291 | 0.137 | Inf | -0.941 | 0.9998 |
| ## | 6 - 13 | -0.2013 | 0.138 | Inf | -1.456 | 0.9820 |
| ## | 6 - 14 | 0.0681  | 0.138 | Inf | 0.493  | 1.0000 |
| ## | 6 - 15 | -0.0829 | 0.139 | Inf | -0.599 | 1.0000 |
| ## | 7 - 8  | -0.1714 | 0.136 | Inf | -1.262 | 0.9955 |
| ## | 7 - 9  | -0.2138 | 0.136 | Inf | -1.568 | 0.9654 |
| ## | 7 - 10 | -0.1456 | 0.135 | Inf | -1.078 | 0.9992 |
| ## | 7 - 11 | -0.2153 | 0.136 | Inf | -1.579 | 0.9634 |
| ## | 7 - 12 | -0.2860 | 0.136 | Inf | -2.101 | 0.7347 |
| ## | 7 - 13 | -0.3582 | 0.137 | Inf | -2.608 | 0.3642 |
| ## | 7 - 14 | -0.0888 | 0.138 | Inf | -0.644 | 1.0000 |
| ## | 7 - 15 | -0.2399 | 0.138 | Inf | -1.743 | 0.9197 |
| ## | 8 - 9  | -0.0424 | 0.137 | Inf | -0.310 | 1.0000 |
| ## | 8 - 10 | 0.0258  | 0.137 | Inf | 0.189  | 1.0000 |
| ## | 8 - 11 | -0.0439 | 0.138 | Inf | -0.319 | 1.0000 |
| ## | 8 - 12 | -0.1147 | 0.136 | Inf | -0.841 | 1.0000 |
| ## | 8 - 13 | -0.1868 | 0.138 | Inf | -1.352 | 0.9911 |

```

## 8 - 14      0.0825 0.138 Inf  0.597  1.0000
## 8 - 15     -0.0685 0.138 Inf -0.496  1.0000
## 9 - 10      0.0682 0.137 Inf  0.499  1.0000
## 9 - 11     -0.0015 0.138 Inf -0.011  1.0000
## 9 - 12     -0.0722 0.137 Inf -0.526  1.0000
## 9 - 13     -0.1444 0.139 Inf -1.039  0.9994
## 9 - 14      0.1250 0.139 Inf  0.900  0.9999
## 9 - 15     -0.0260 0.139 Inf -0.187  1.0000
## 10 - 11    -0.0697 0.137 Inf -0.508  1.0000
## 10 - 12    -0.1405 0.136 Inf -1.030  0.9995
## 10 - 13    -0.2126 0.138 Inf -1.543  0.9700
## 10 - 14     0.0567 0.138 Inf  0.411  1.0000
## 10 - 15    -0.0943 0.138 Inf -0.684  1.0000
## 11 - 12    -0.0708 0.138 Inf -0.514  1.0000
## 11 - 13    -0.1429 0.140 Inf -1.023  0.9995
## 11 - 14     0.1264 0.139 Inf  0.908  0.9999
## 11 - 15    -0.0246 0.139 Inf -0.177  1.0000
## 12 - 13    -0.0721 0.138 Inf -0.521  1.0000
## 12 - 14     0.1972 0.138 Inf  1.432  0.9846
## 12 - 15     0.0462 0.138 Inf  0.334  1.0000
## 13 - 14     0.2693 0.139 Inf  1.931  0.8378
## 13 - 15     0.1183 0.140 Inf  0.847  1.0000
## 14 - 15    -0.1510 0.139 Inf -1.084  0.9991

```

```

##
## Results are averaged over the levels of: BreedGroup, Play
## Results are given on the log (not the response) scale.
## P value adjustment: tukey method for comparing a family of 15 estimates

```

```

pairs(emmeans(EC_mod, ~BreedGroup))

```

```

## contrast      estimate      SE  df z.ratio p.value
## Coop - Mixed      0.0102 0.251 Inf  0.040  0.9991
## Coop - Noncoop    1.0868 0.298 Inf  3.643  0.0008
## Mixed - Noncoop    1.0766 0.273 Inf  3.949  0.0002

```

```

##
## Results are averaged over the levels of: Trial, Play
## Results are given on the log (not the response) scale.
## P value adjustment: tukey method for comparing a family of 3 estimates

```
